# Supplementary material for: Optical Super‐Resonances in Mesoscale Dielectric Cenosphere: Giant Magnetic Field Generations
Source: Preprints.org preprint supplement (doi:10.20944/preprints202307.1621.v1), 2023-07-25
Supplement: Supplementary file 1 [file supplementary]

**Optical super-resonances in mesoscale dielectric cenosphere: giant magnetic field generations**

**Oleg V. Minina, Song Zhoub, and Igor V. Minina**

*aNational Research Tomsk Polytechnical University, Tomsk, 634050 Russia*

*bJiangsu Key Laboratory of Advanced Manufacturing Technology, Faculty of Mechanical and Material Engineering, Huaiyin Institute of Technology, Huai’an, 223003 China*

********Corresponding author: prof.minin@gmail.com*

**Supplementary**

MCT 140 ceramic based small sphere (*q<1*) resonances at 2.5 GHz with , [1]. Algorithm of the Mie simulation is describe in details in [2].


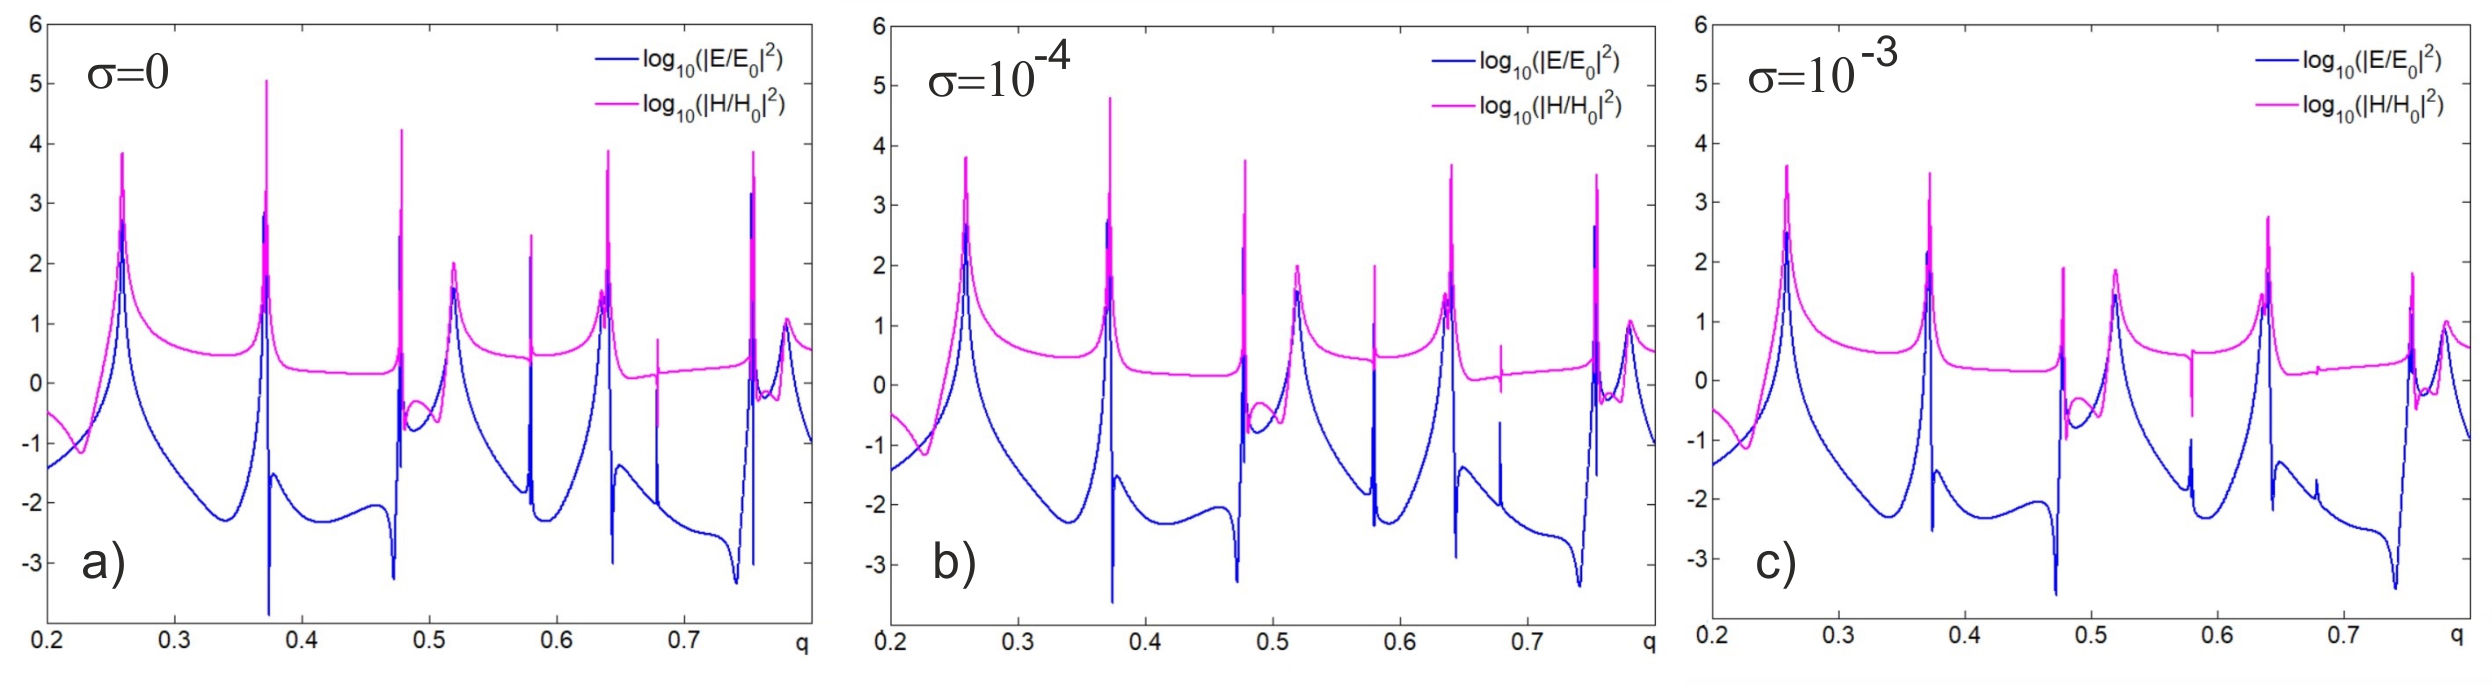


Figure S1. Fiends intensity enhancement at shadow pole of spherical particle vs size parameter q at different absorption . Resonant Mie size parameters are: , , , , .


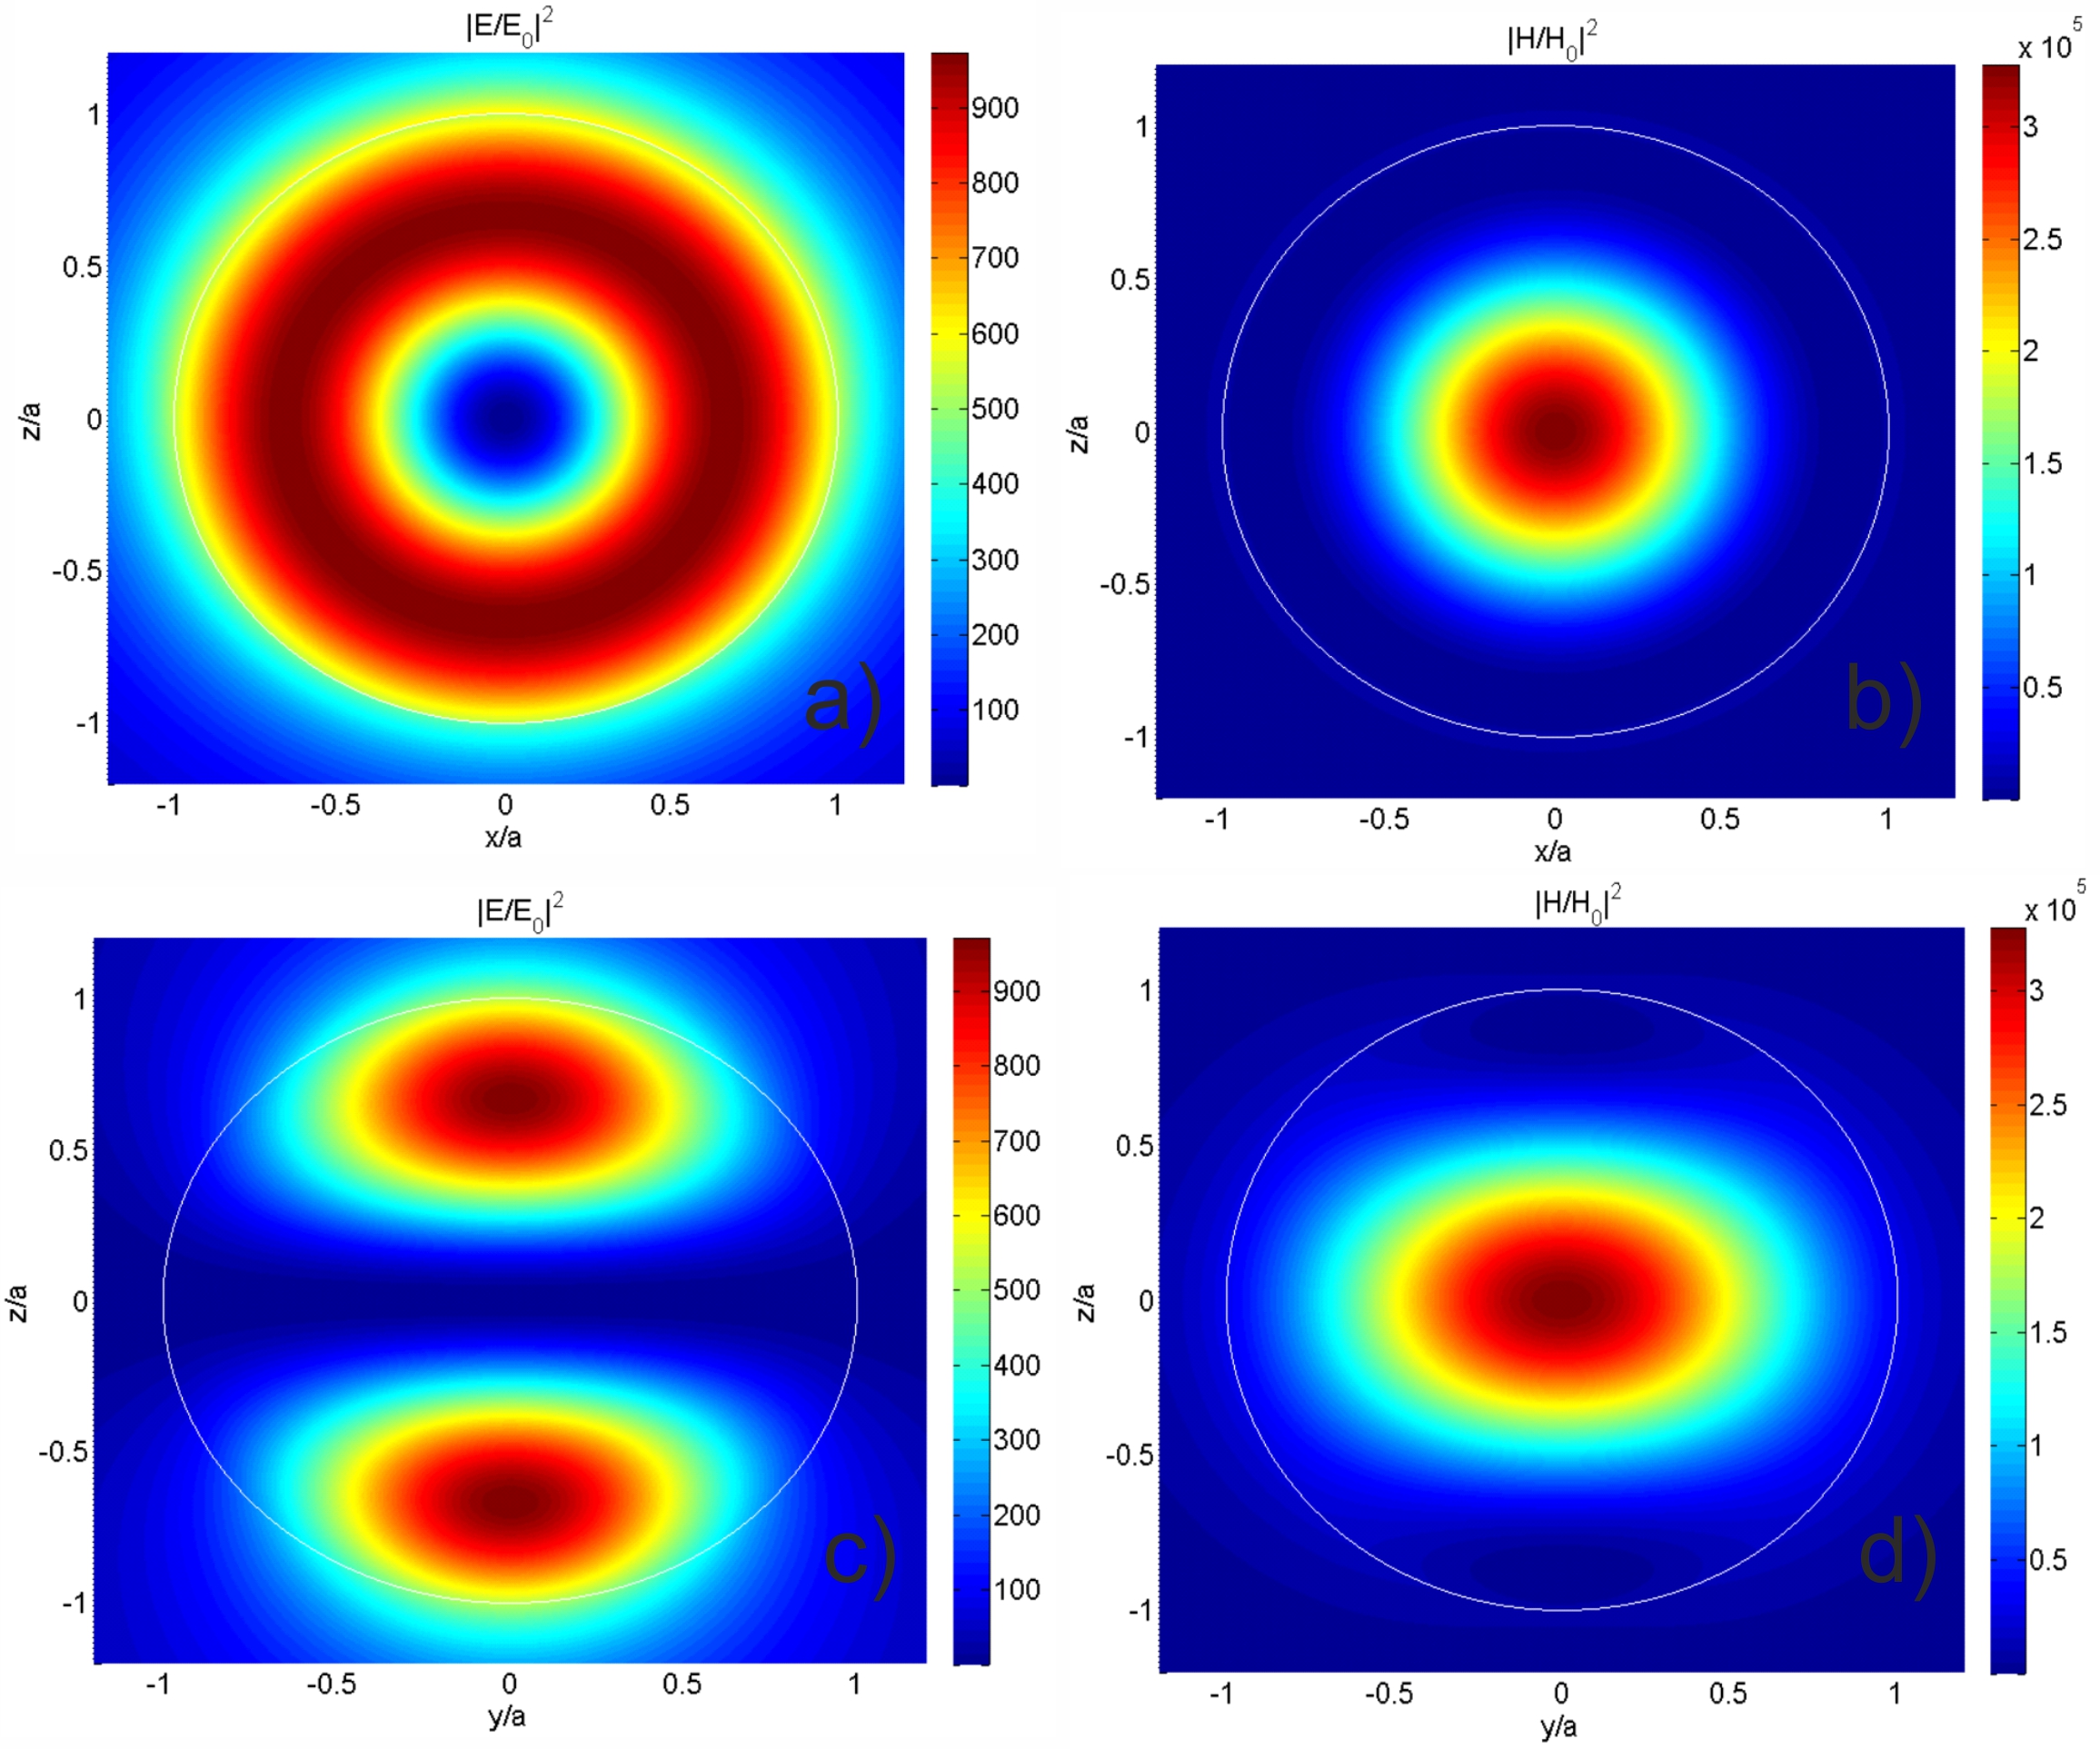


Figure S2. The electric (a,c) and magnetic (b,d) field intensity enhancement distributions inside the particle within the *xz* (a,b) and *yz* (c,d) -planes for .


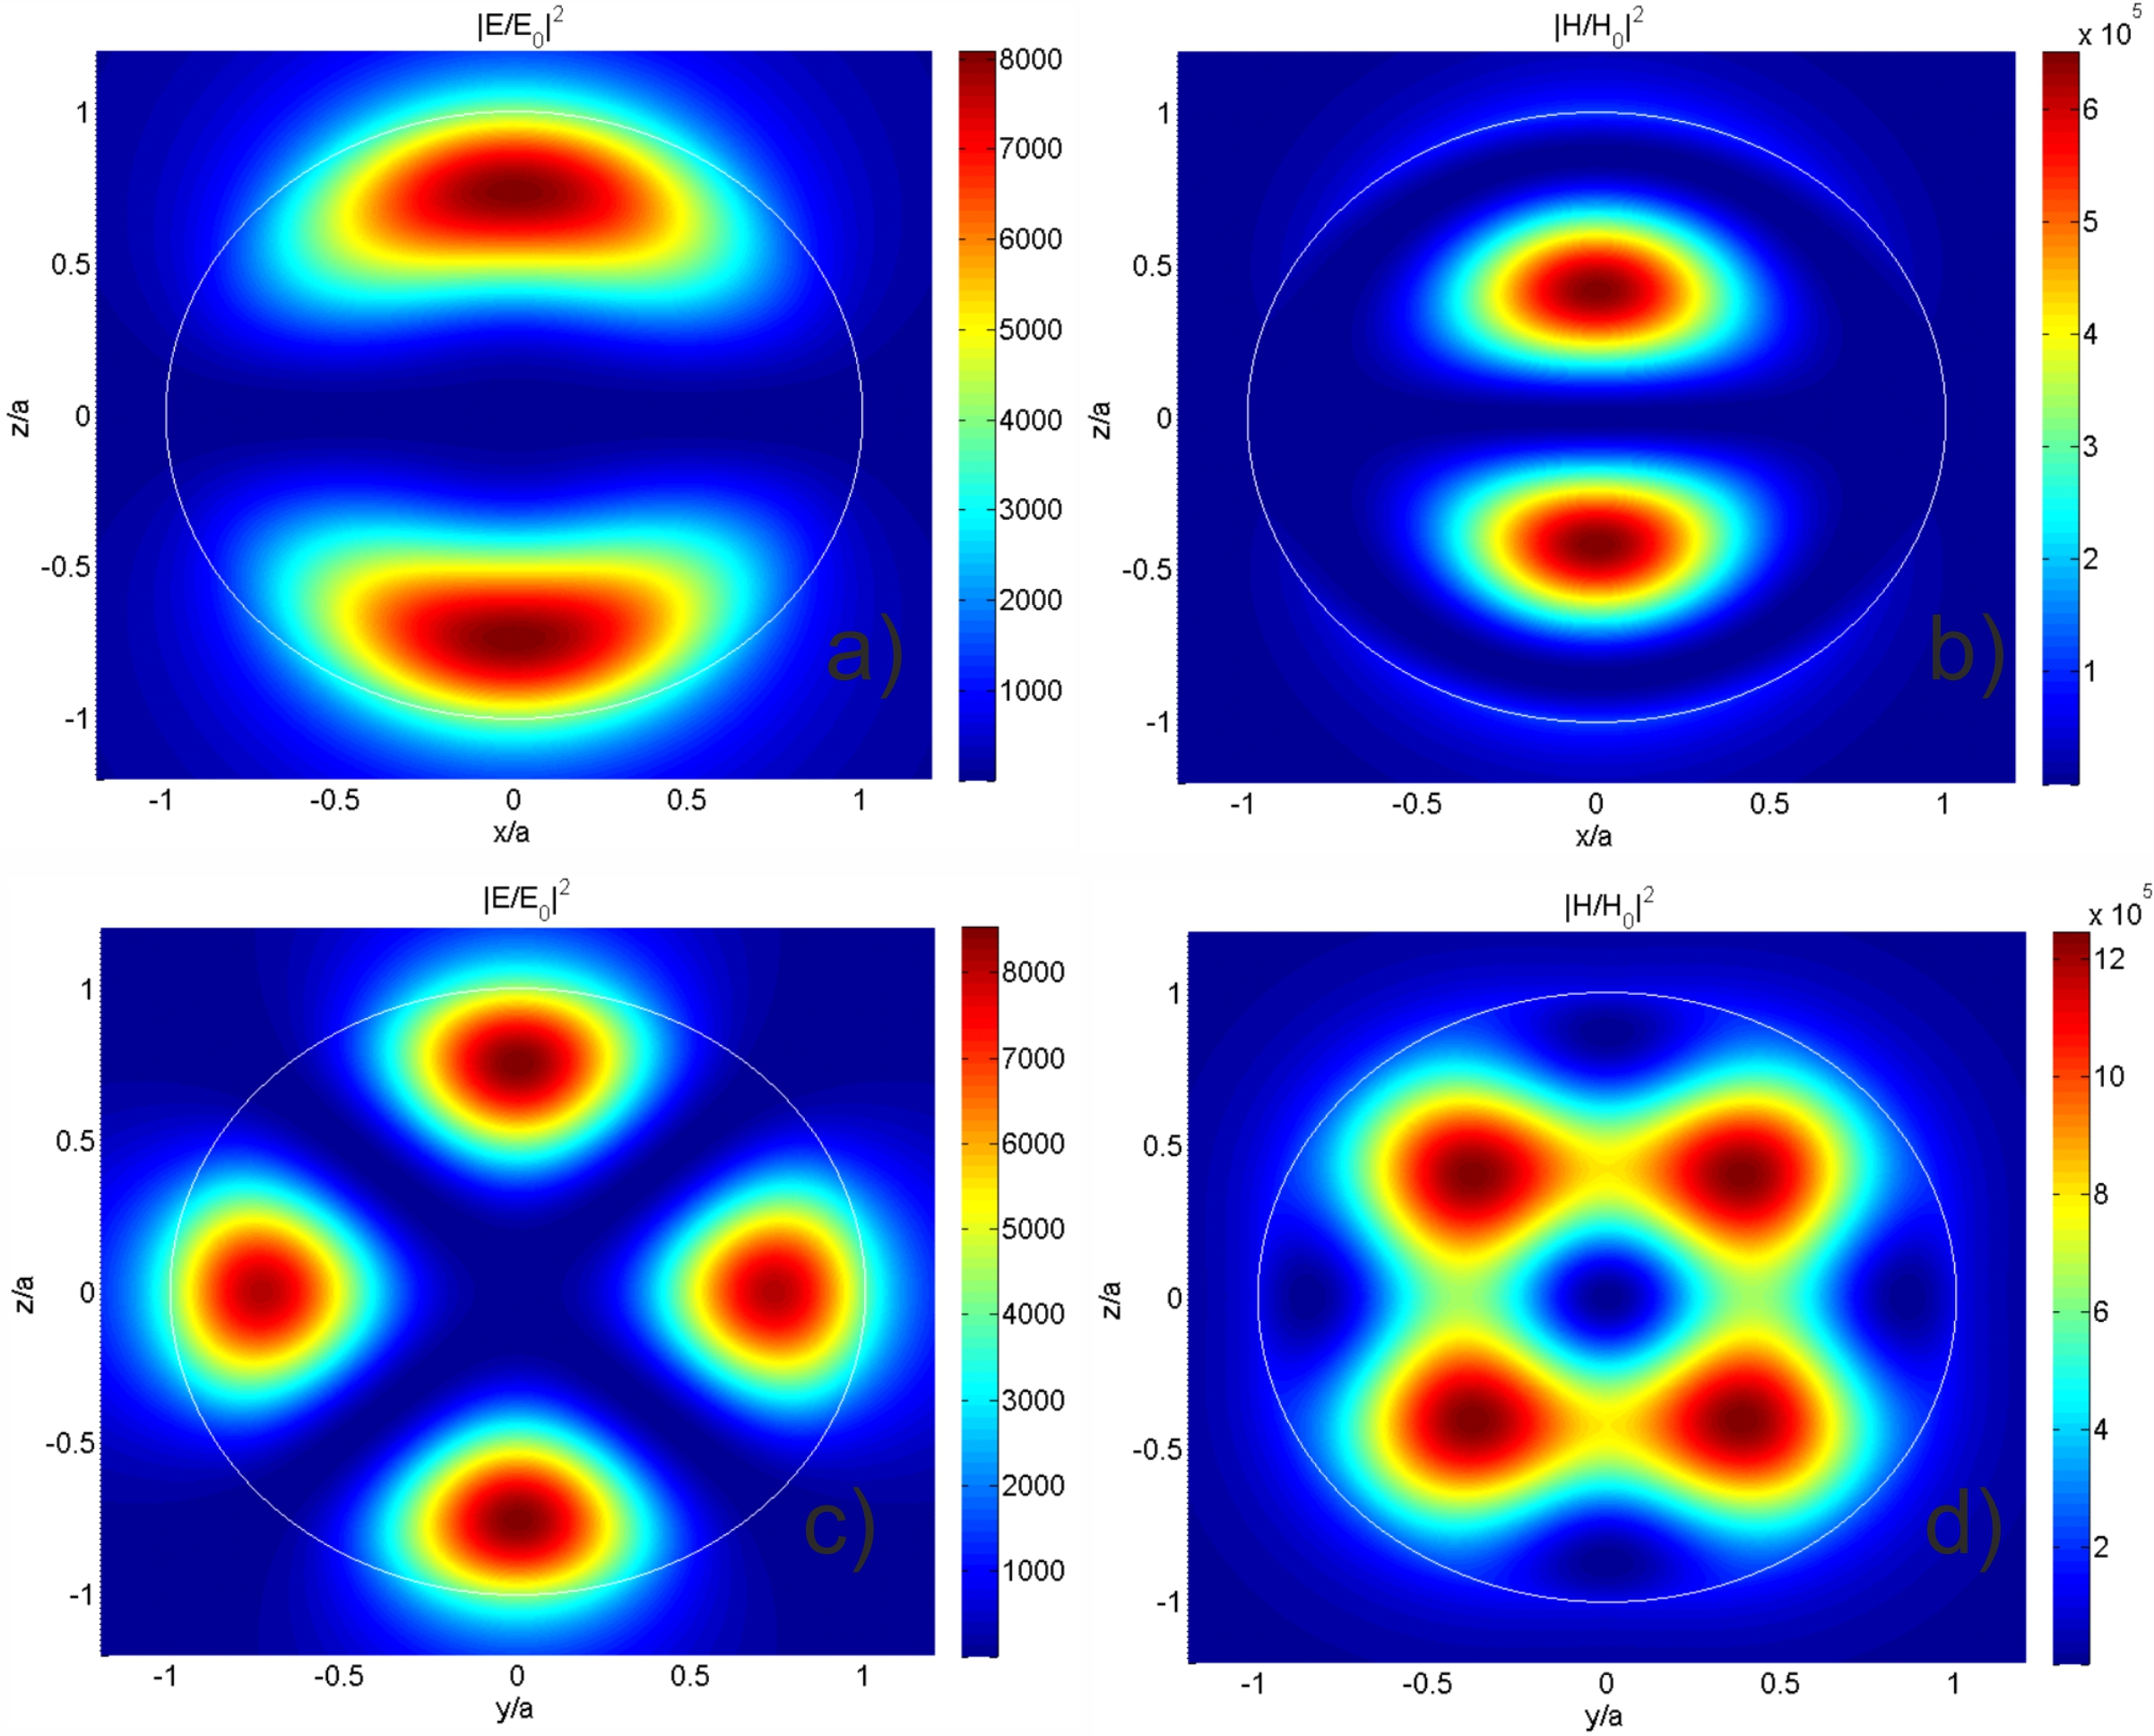


Figure S3. The electric (a,c) and magnetic (b,d) field intensity enhancement distributions inside the particle within the *xz* (a,b) and *yz* (c,d) -planes for .


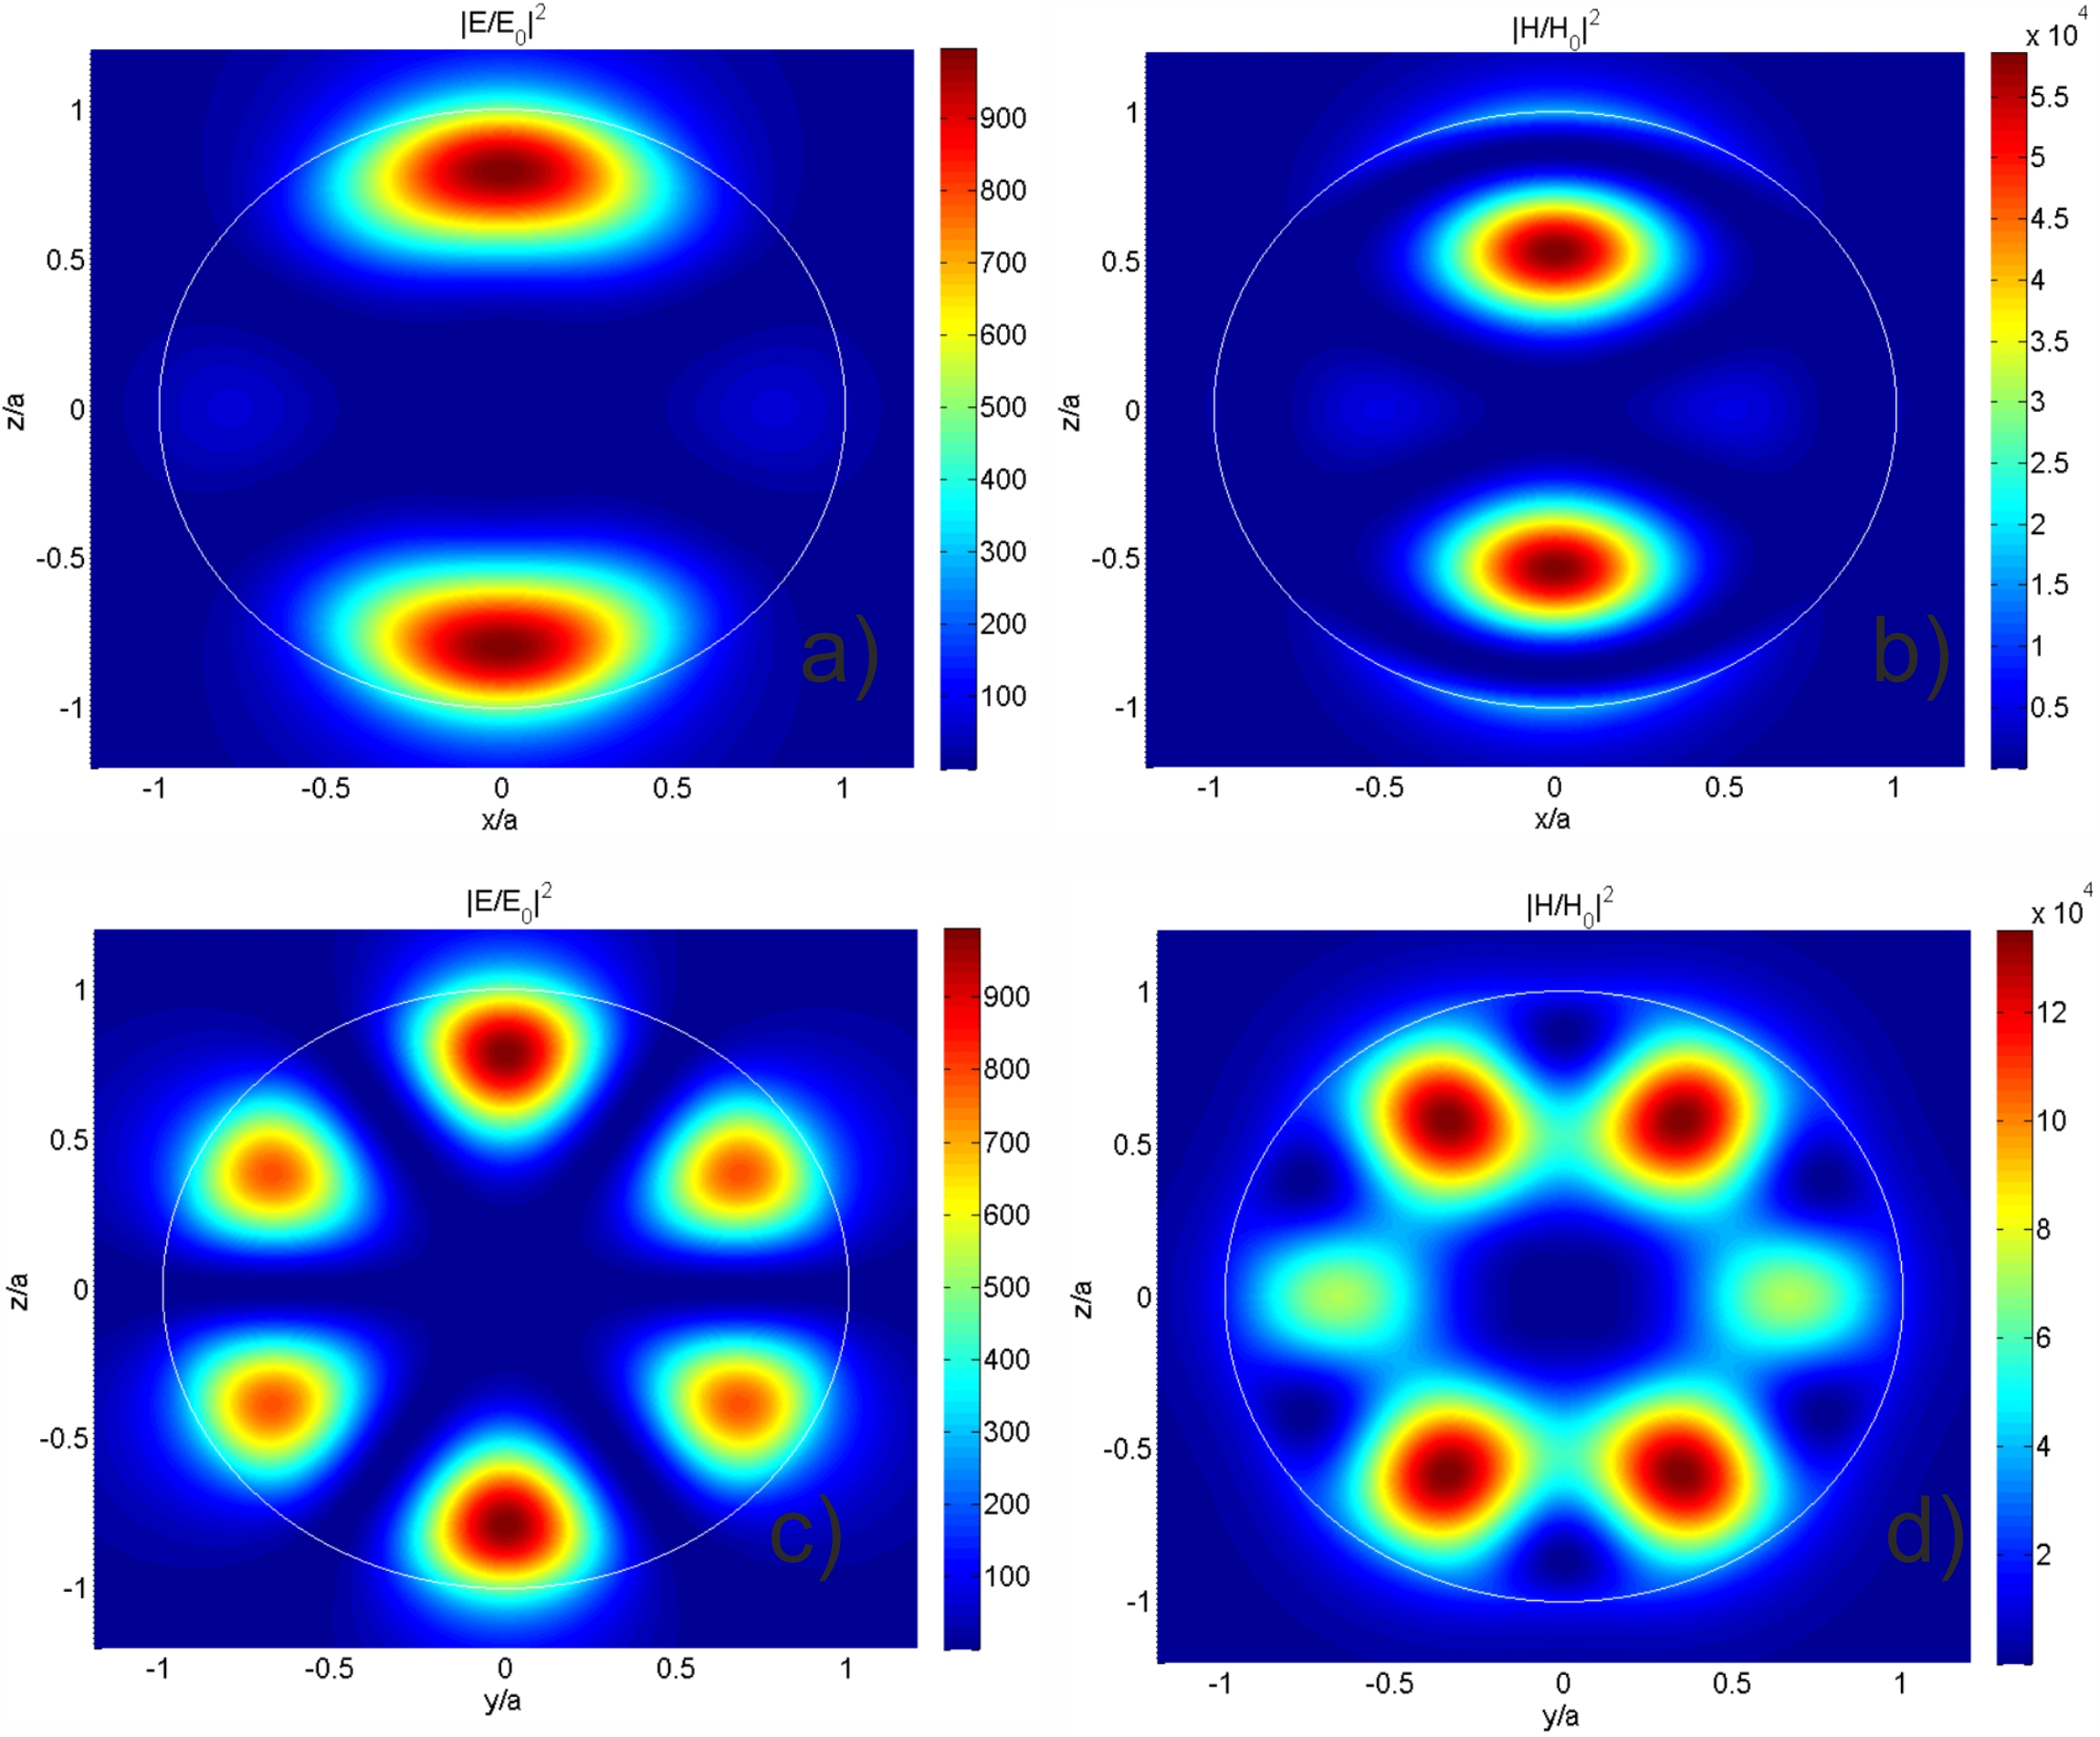


Figure S4. The electric (a,c) and magnetic (b,d) field intensity enhancement distributions inside the particle within the *xz* (a,b) and *yz* (c,d) -planes for .


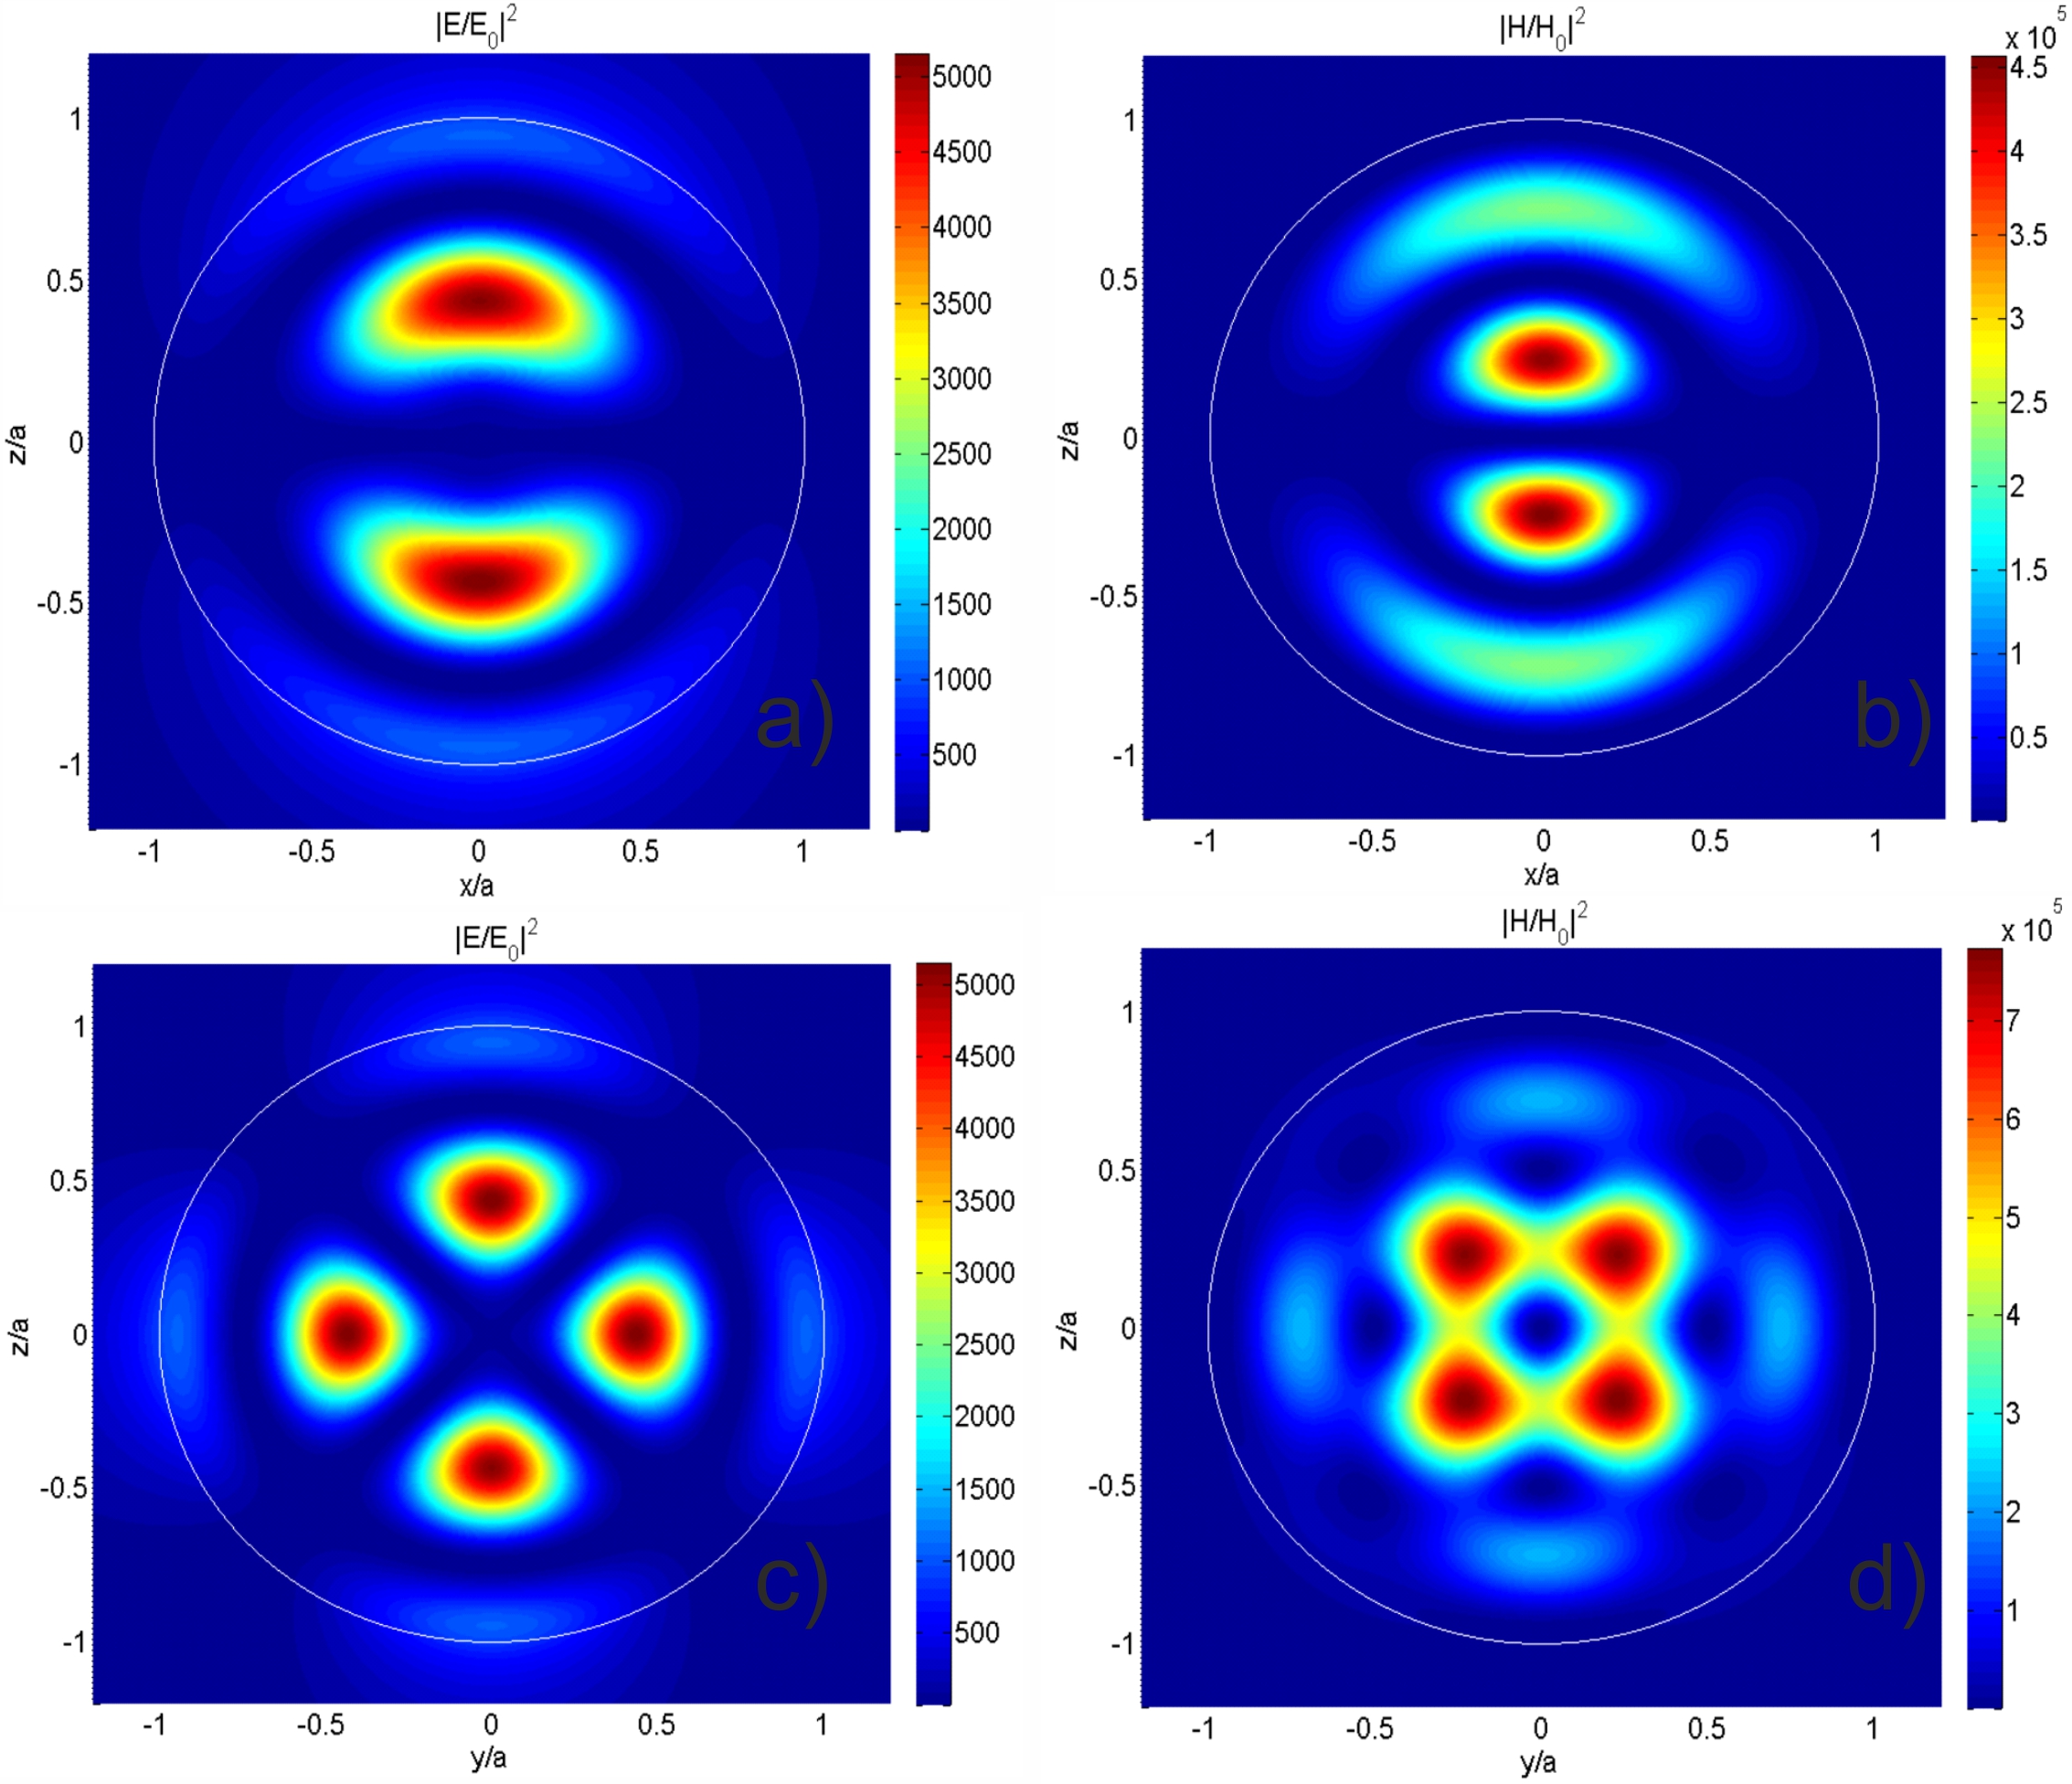


Figure S5. The electric (a,c) and magnetic (b,d) field intensity enhancement distributions inside the particle within the *xz* (a,b) and *yz* (c,d) -planes for .


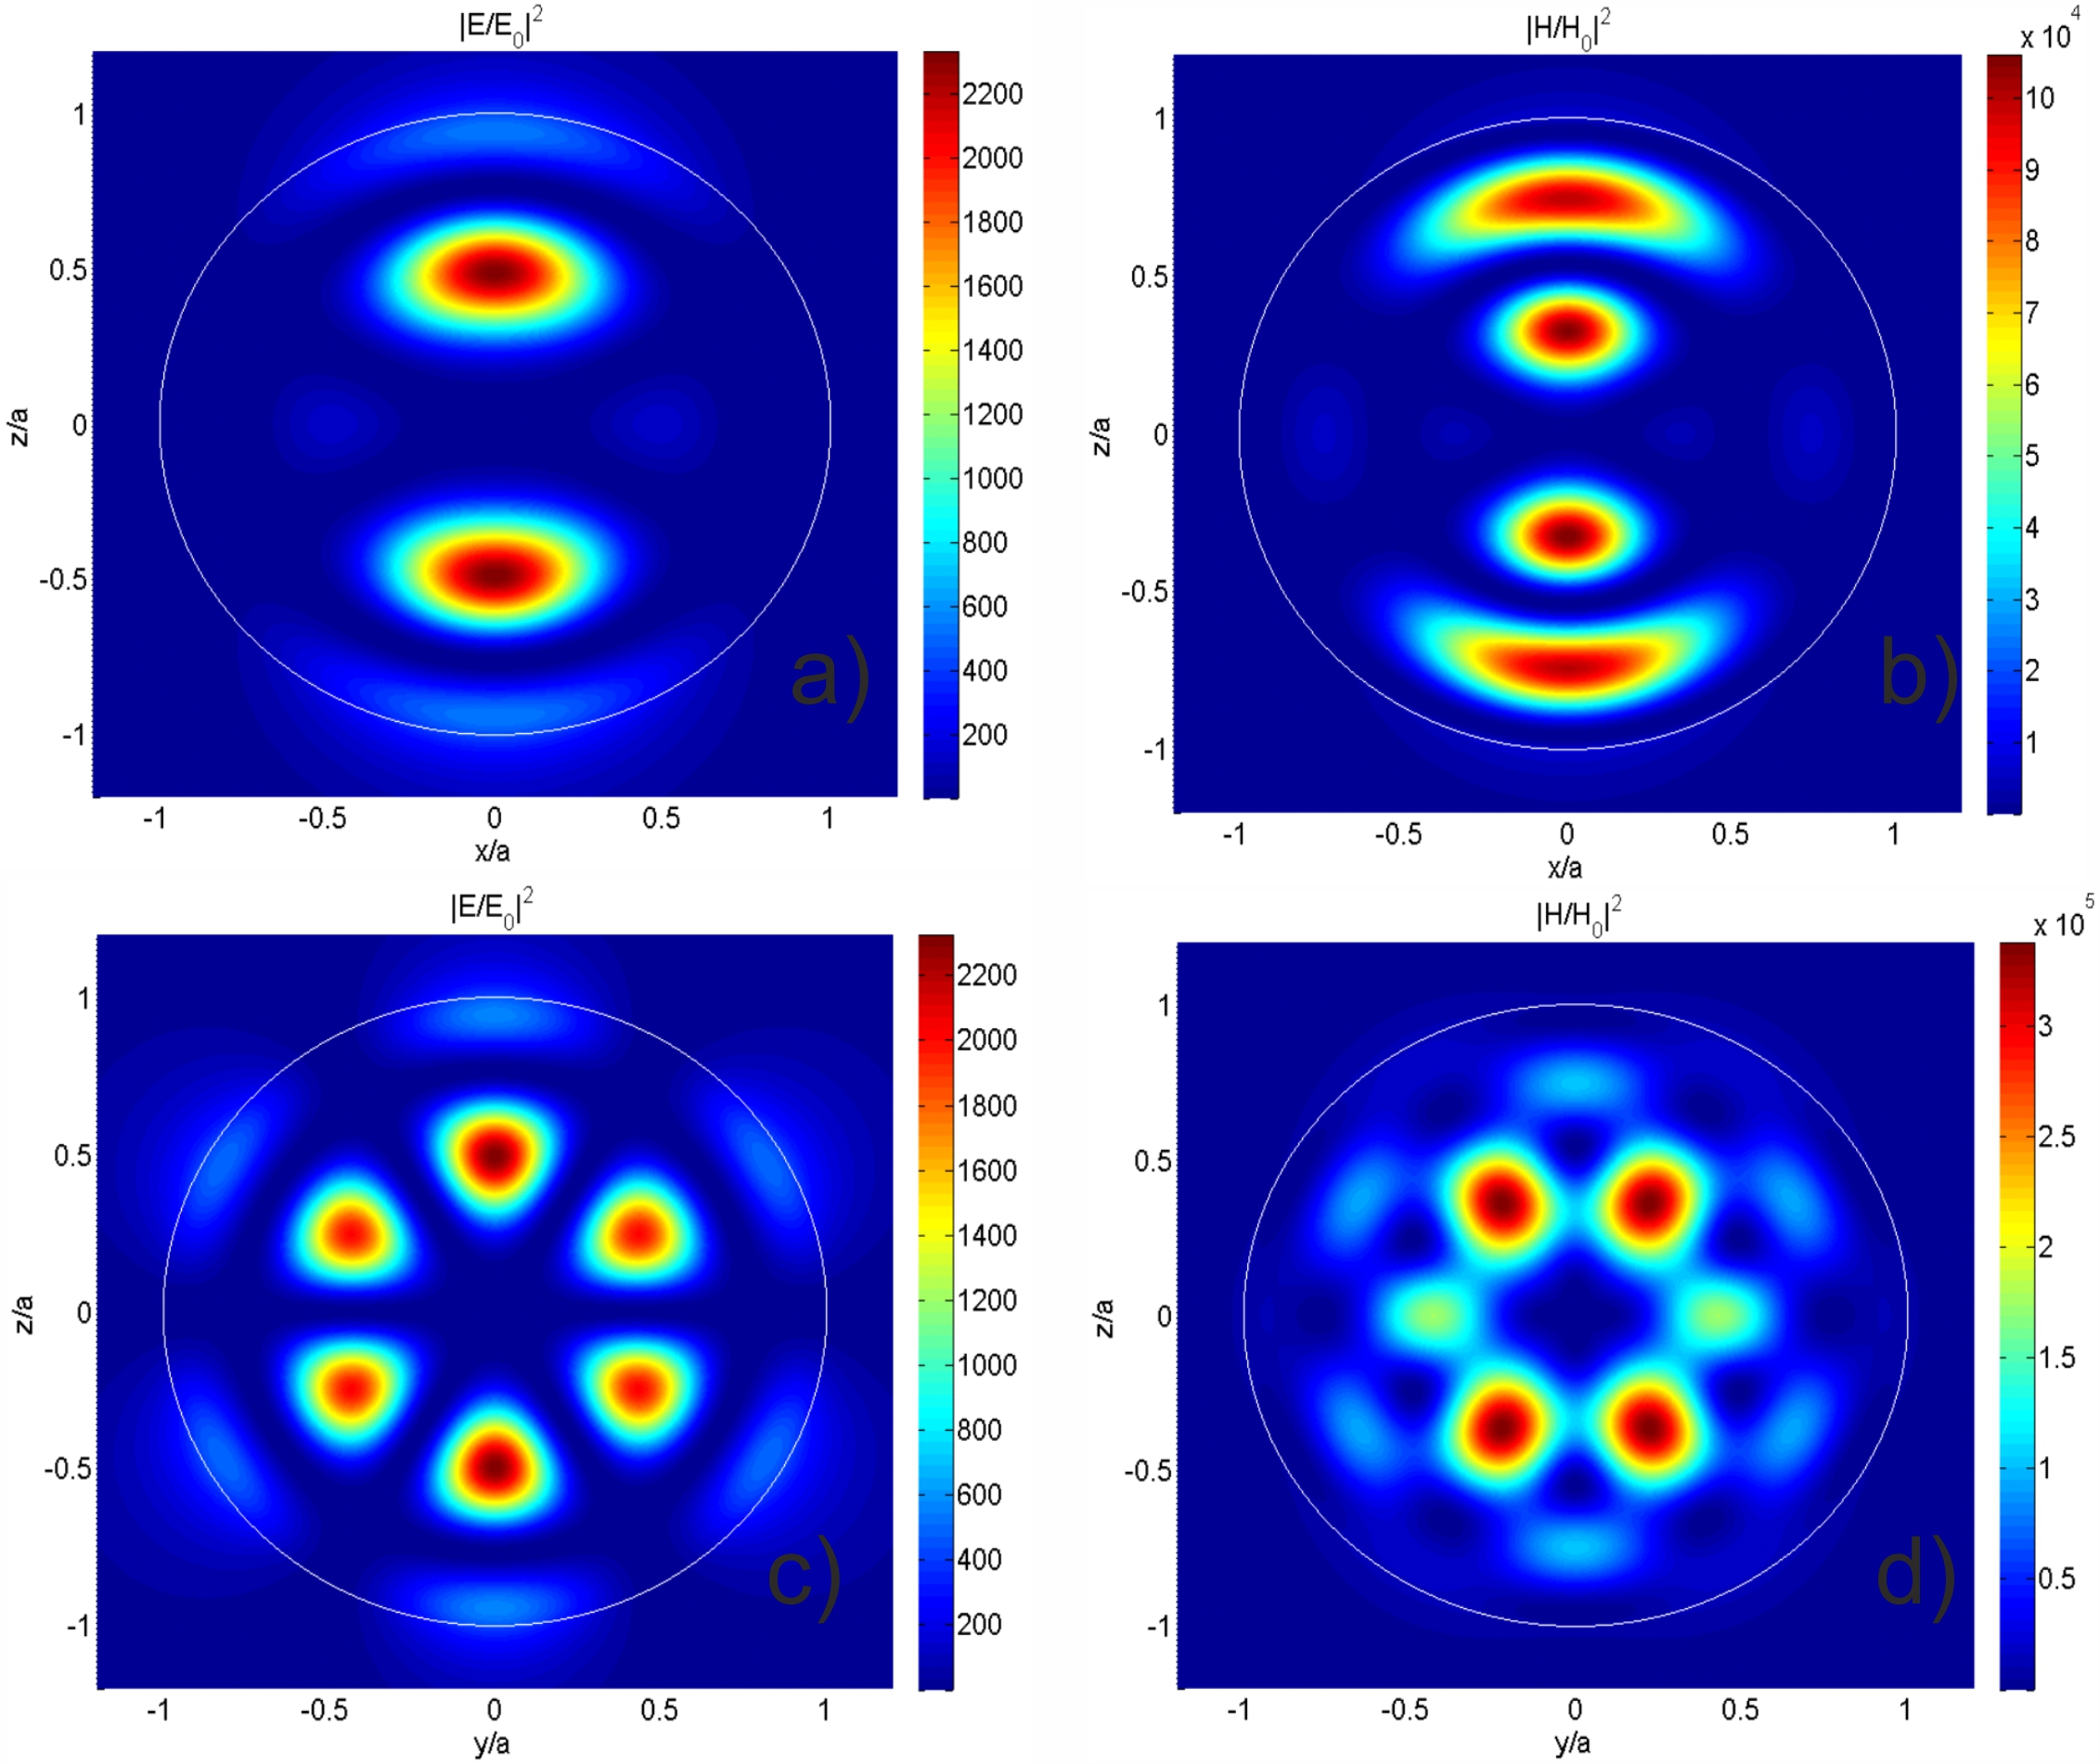


Figure S6. The electric (a,c) and magnetic (b,d) field intensity enhancement distributions inside the particle within the *xz* (a,b) and *yz* (c,d) -planes for .

Table 1. FWHM inside spherical particle fot the first two resonant values of *q*.

| FWHMx,E | FWHMy,E | FWHMx,H | FWHMy,H |
| --- | --- | --- | --- |
| q=0.2595 | | | |
| 0.055 λ | 0.044 λ | 0.041 λ | 0.069 λ |
| q=0.3727 | | | |
| 0.052 λ | 0.038 λ | 0.046 λ | 0.079 λ |

a)b)


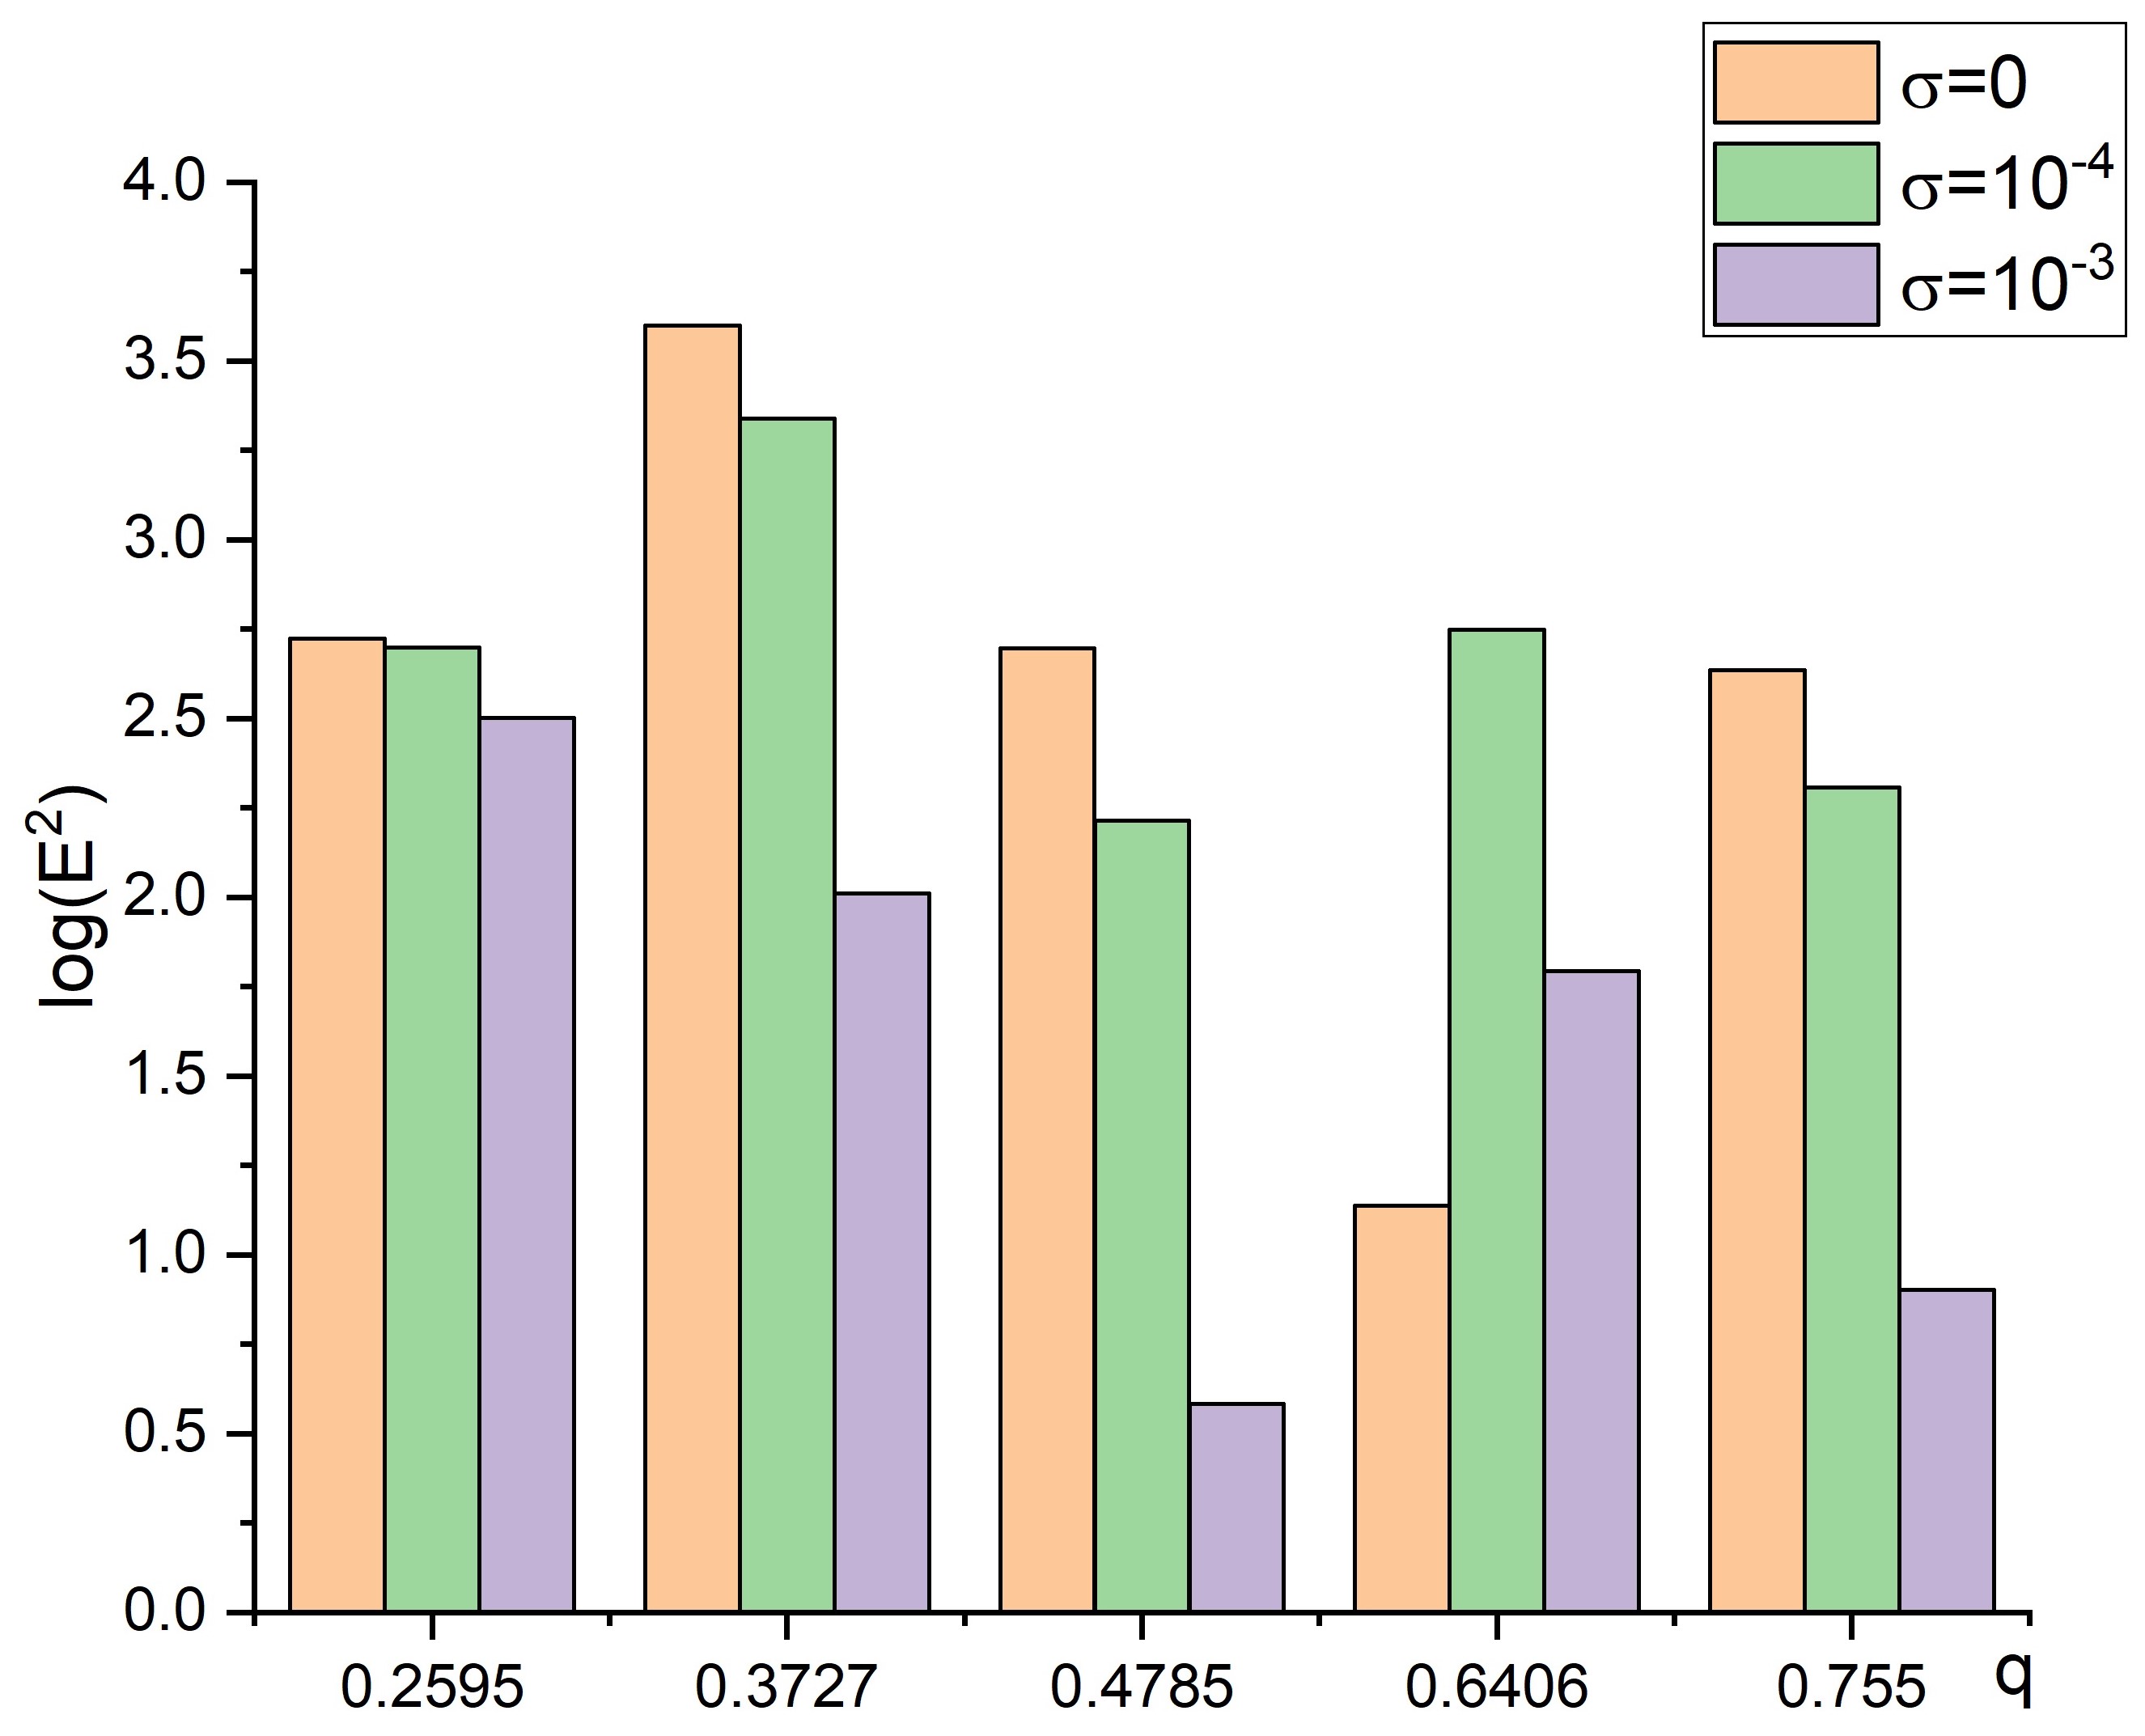

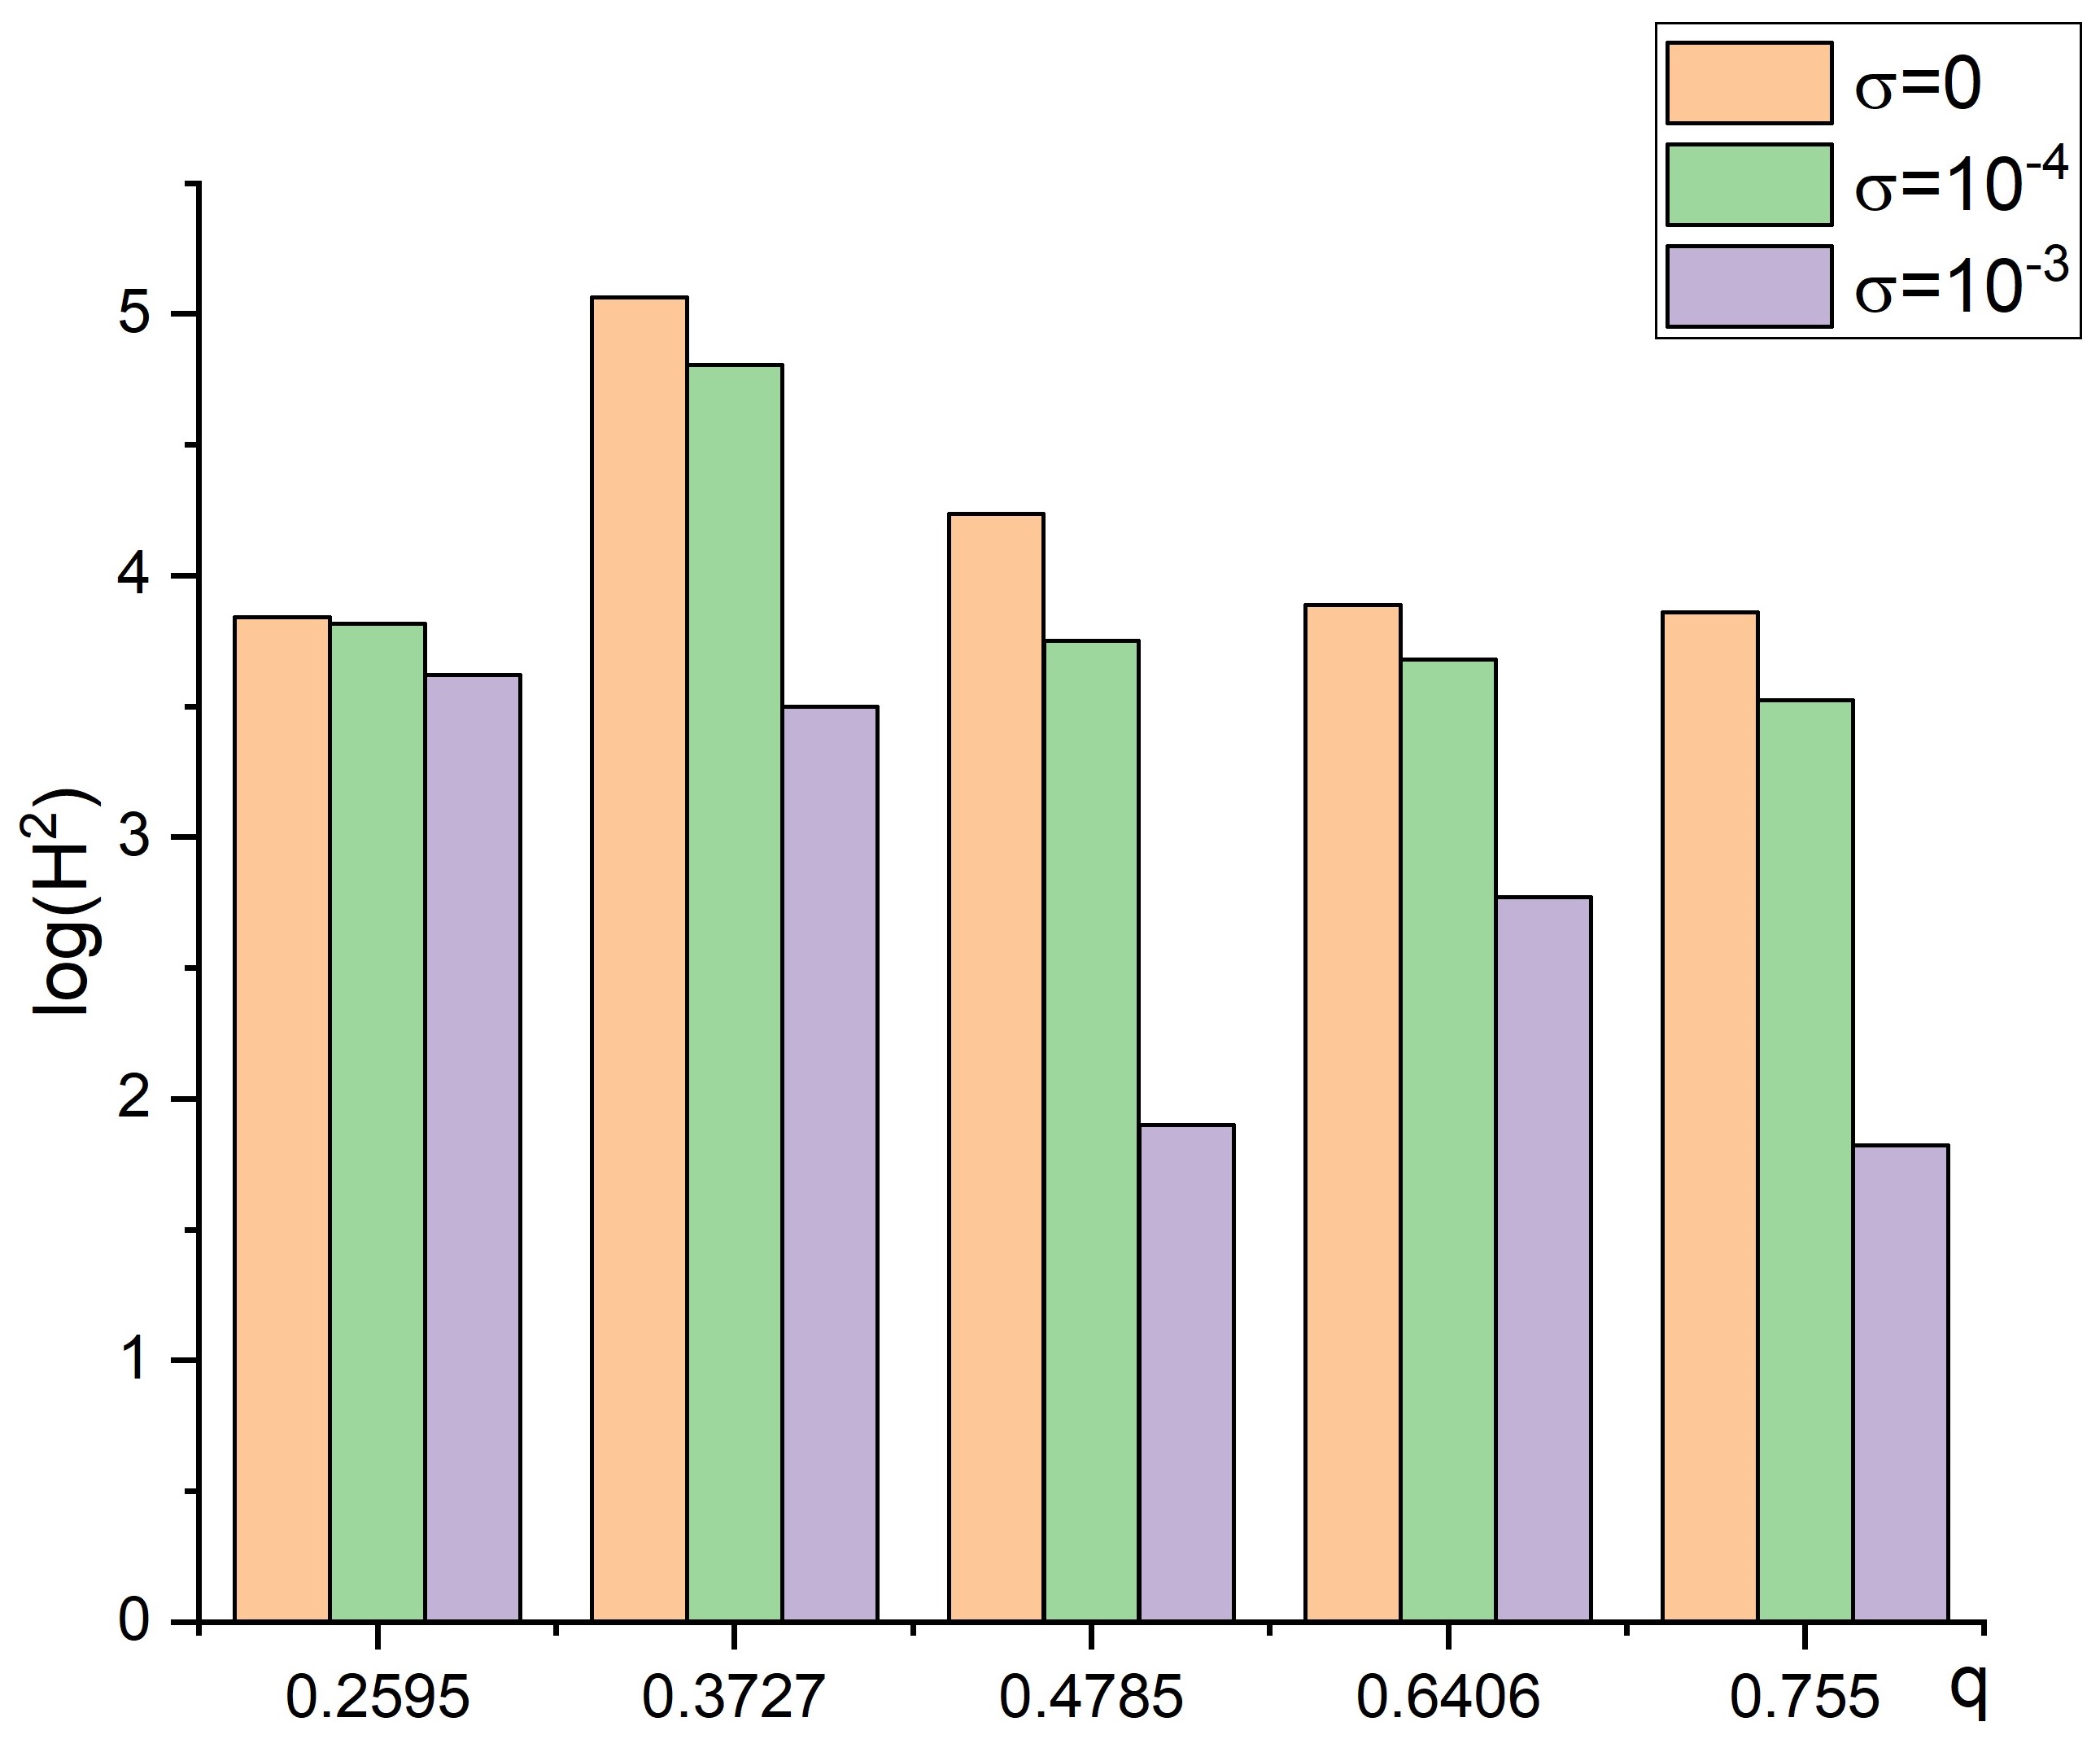


Figure S7. A comparison between the maximal fields intensity enhancement of the electric (a) and magnetic (b) vs size parameter *q*.

Table 2. Amplitudes and mode numbers of the resonant values of Mie coefficients for different absorption :

| **q** | **Resonant coefficient** | **Max(E2)** | **Max(H2）** |
| --- | --- | --- | --- |
| 0.2595 | |mA1|=71.37 | 971.2 | 3.275e5 |
| 0.3727 | |mA2|=98.84 | 8077.5 | 6.509e5 |
| 0.4785 | |mA3|=21.49 | 993.3 | 5.842e4 |
| 0.6404 | |mA2|=35.83  |eA1|=13.88 | 1210.4 | 1.362e5 |
| 0.7550 | |mA3|=33.79 | 2330.0 | 1.059e5 |

| **q** | **Resonant coefficient** | **Max(E2）** | **Max(H2）** |
| --- | --- | --- | --- |
| 0.2595 | |mA1|=71.37 | 917.0 | 3.092e5 |
| 0.3727 | |mA2|=98.84 | 4436.5 | 3.577e5 |
| 0.4785 | |mA3|=21.49 | 328.7 | 1.975e4 |
| 0.6406 | |mA2|=35.83  |eA1|=13.88 | 1067.0 | 1.198e5 |
| 0.7550 | |mA3|=33.79 | 1083.9 | 5.095e4 |

| **q** | **Resonant coefficient** | **Max(E2）** | **Max(H2）** |
| --- | --- | --- | --- |
| 0.2595 | |mA1|=71.37 | 582.3 | 1.963e5 |
| 0.3727 | |mA2|=98.84 | 211.5 | 1.800e4 |
| 0.4785 | |mA3|=21.49 | 13.0 | 661.7 |
| 0.6406 | |mA2|=35.83  |eA1|=13.88 | 312.2 | 3.560e4 |
| 0.7550 | |mA3|=33.79 | 28.9 | 3096.9 |

I) II)


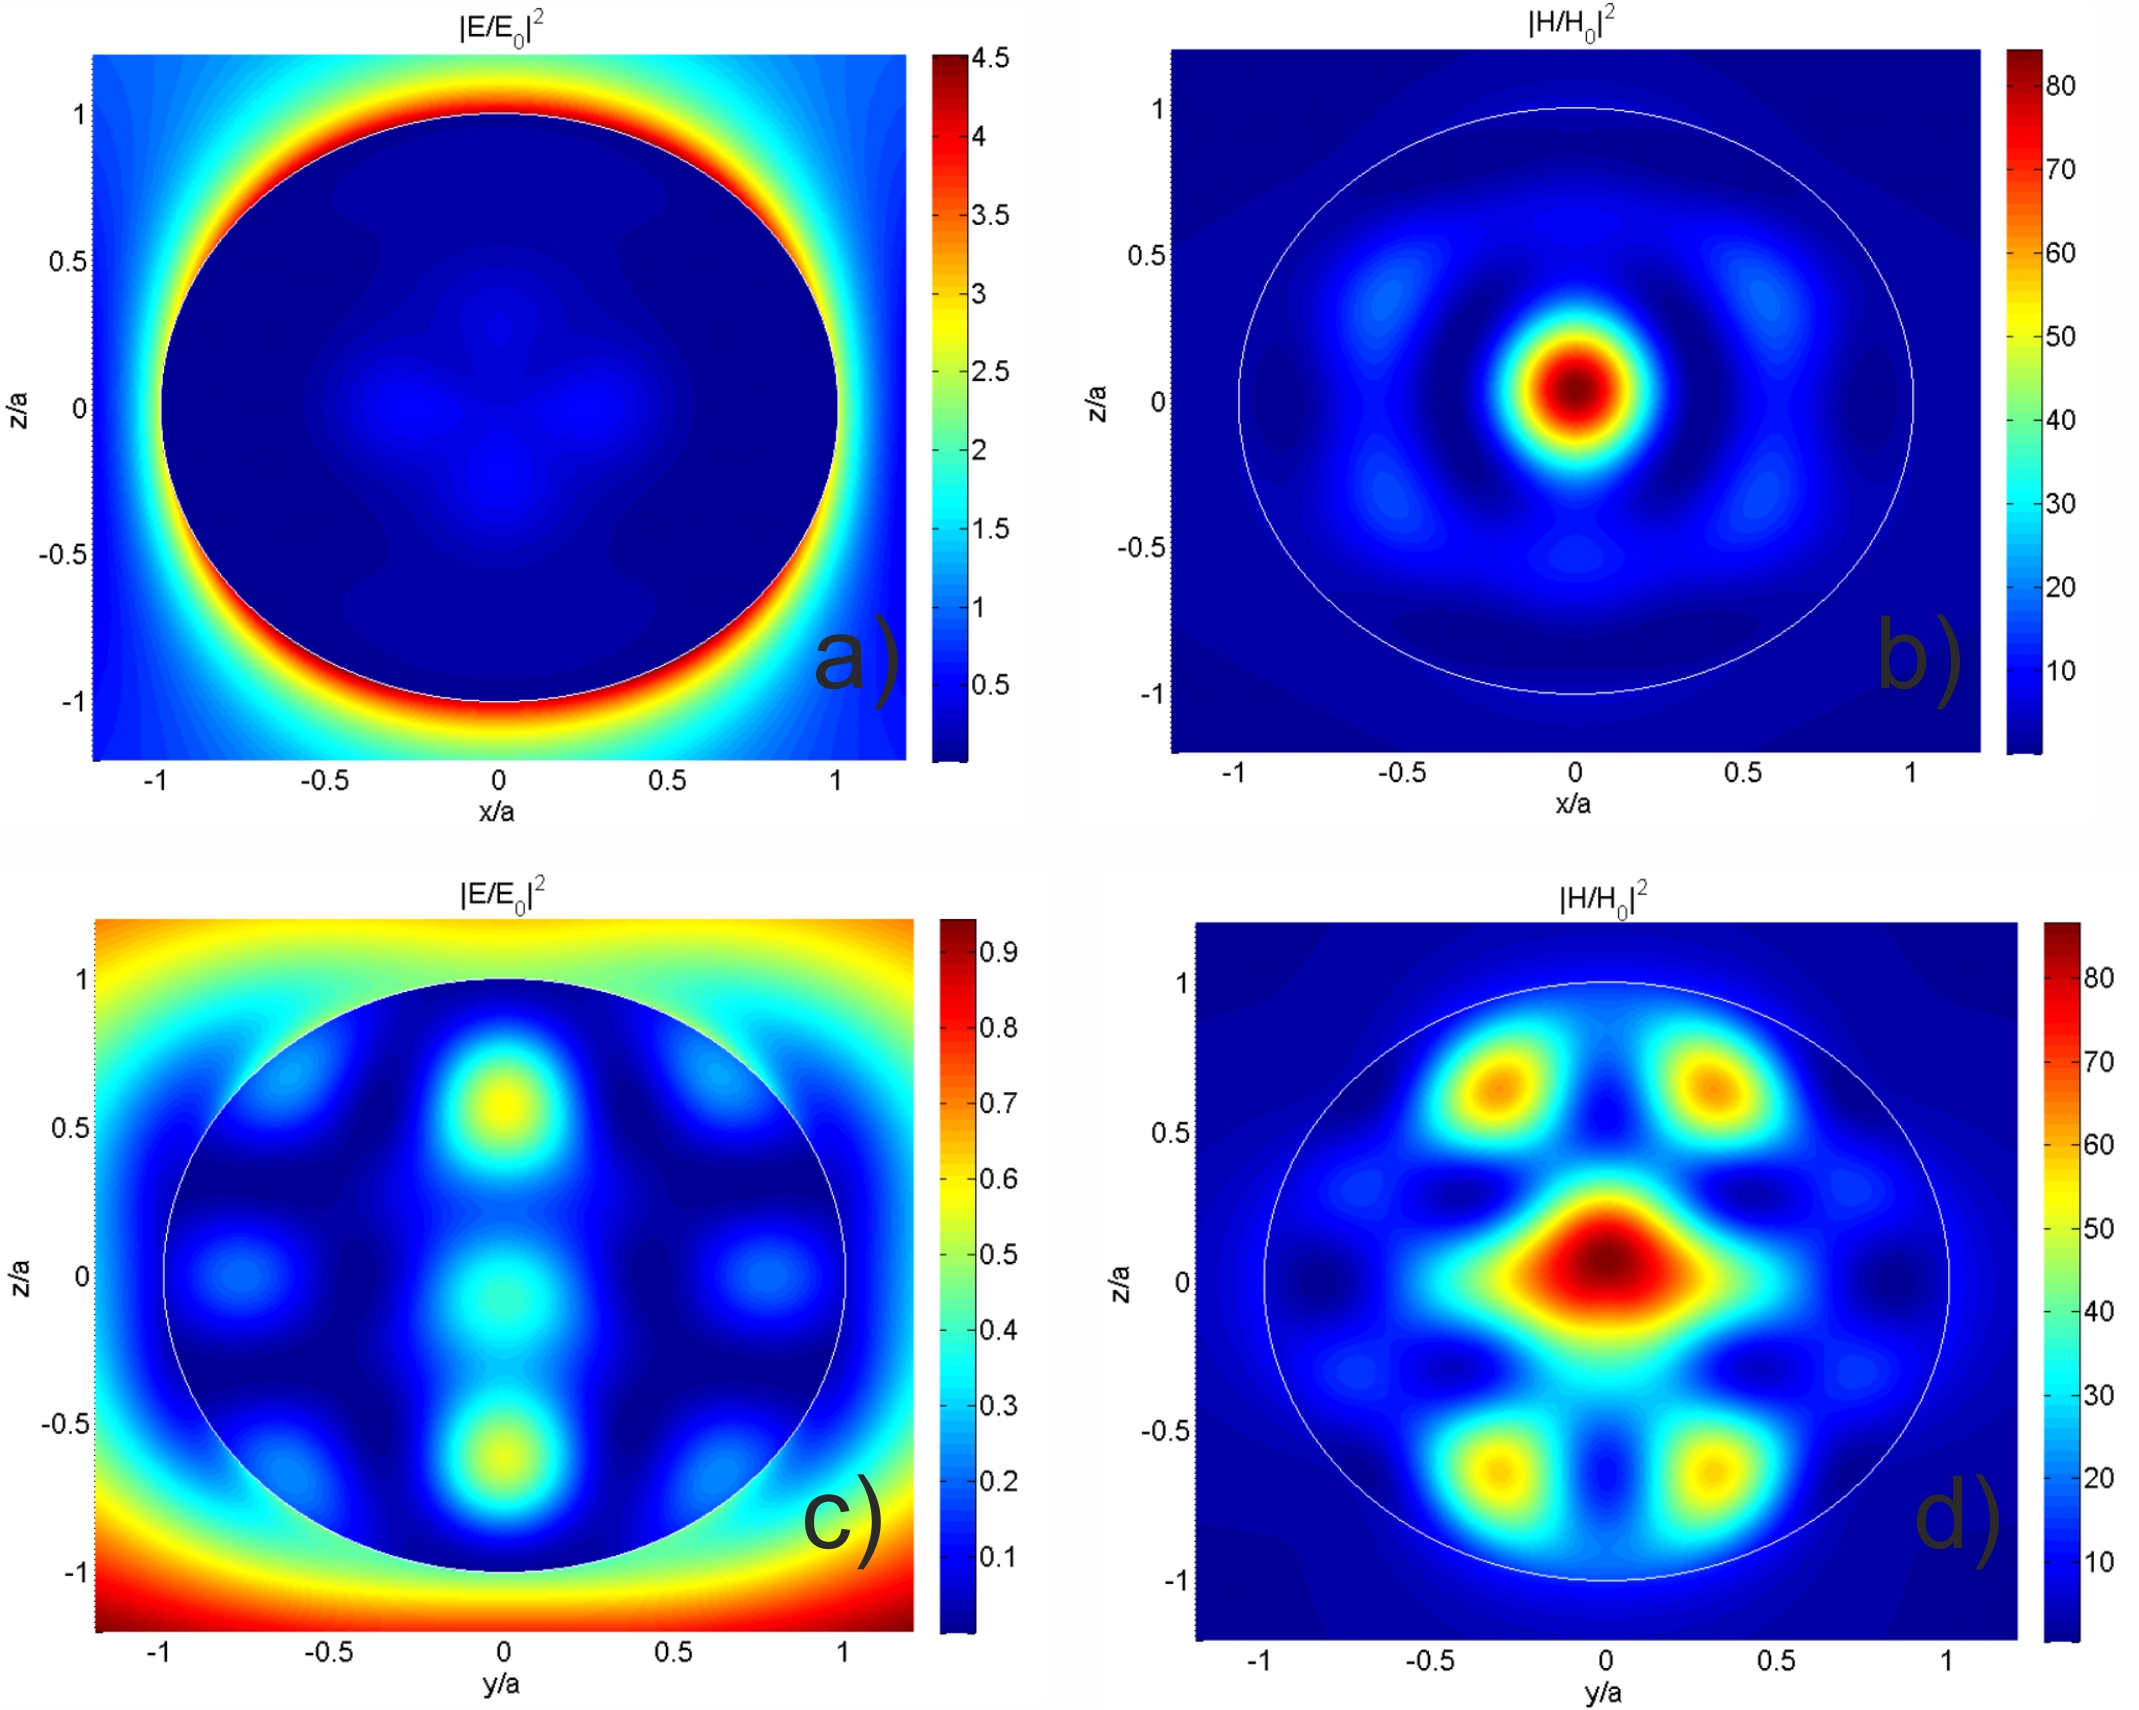

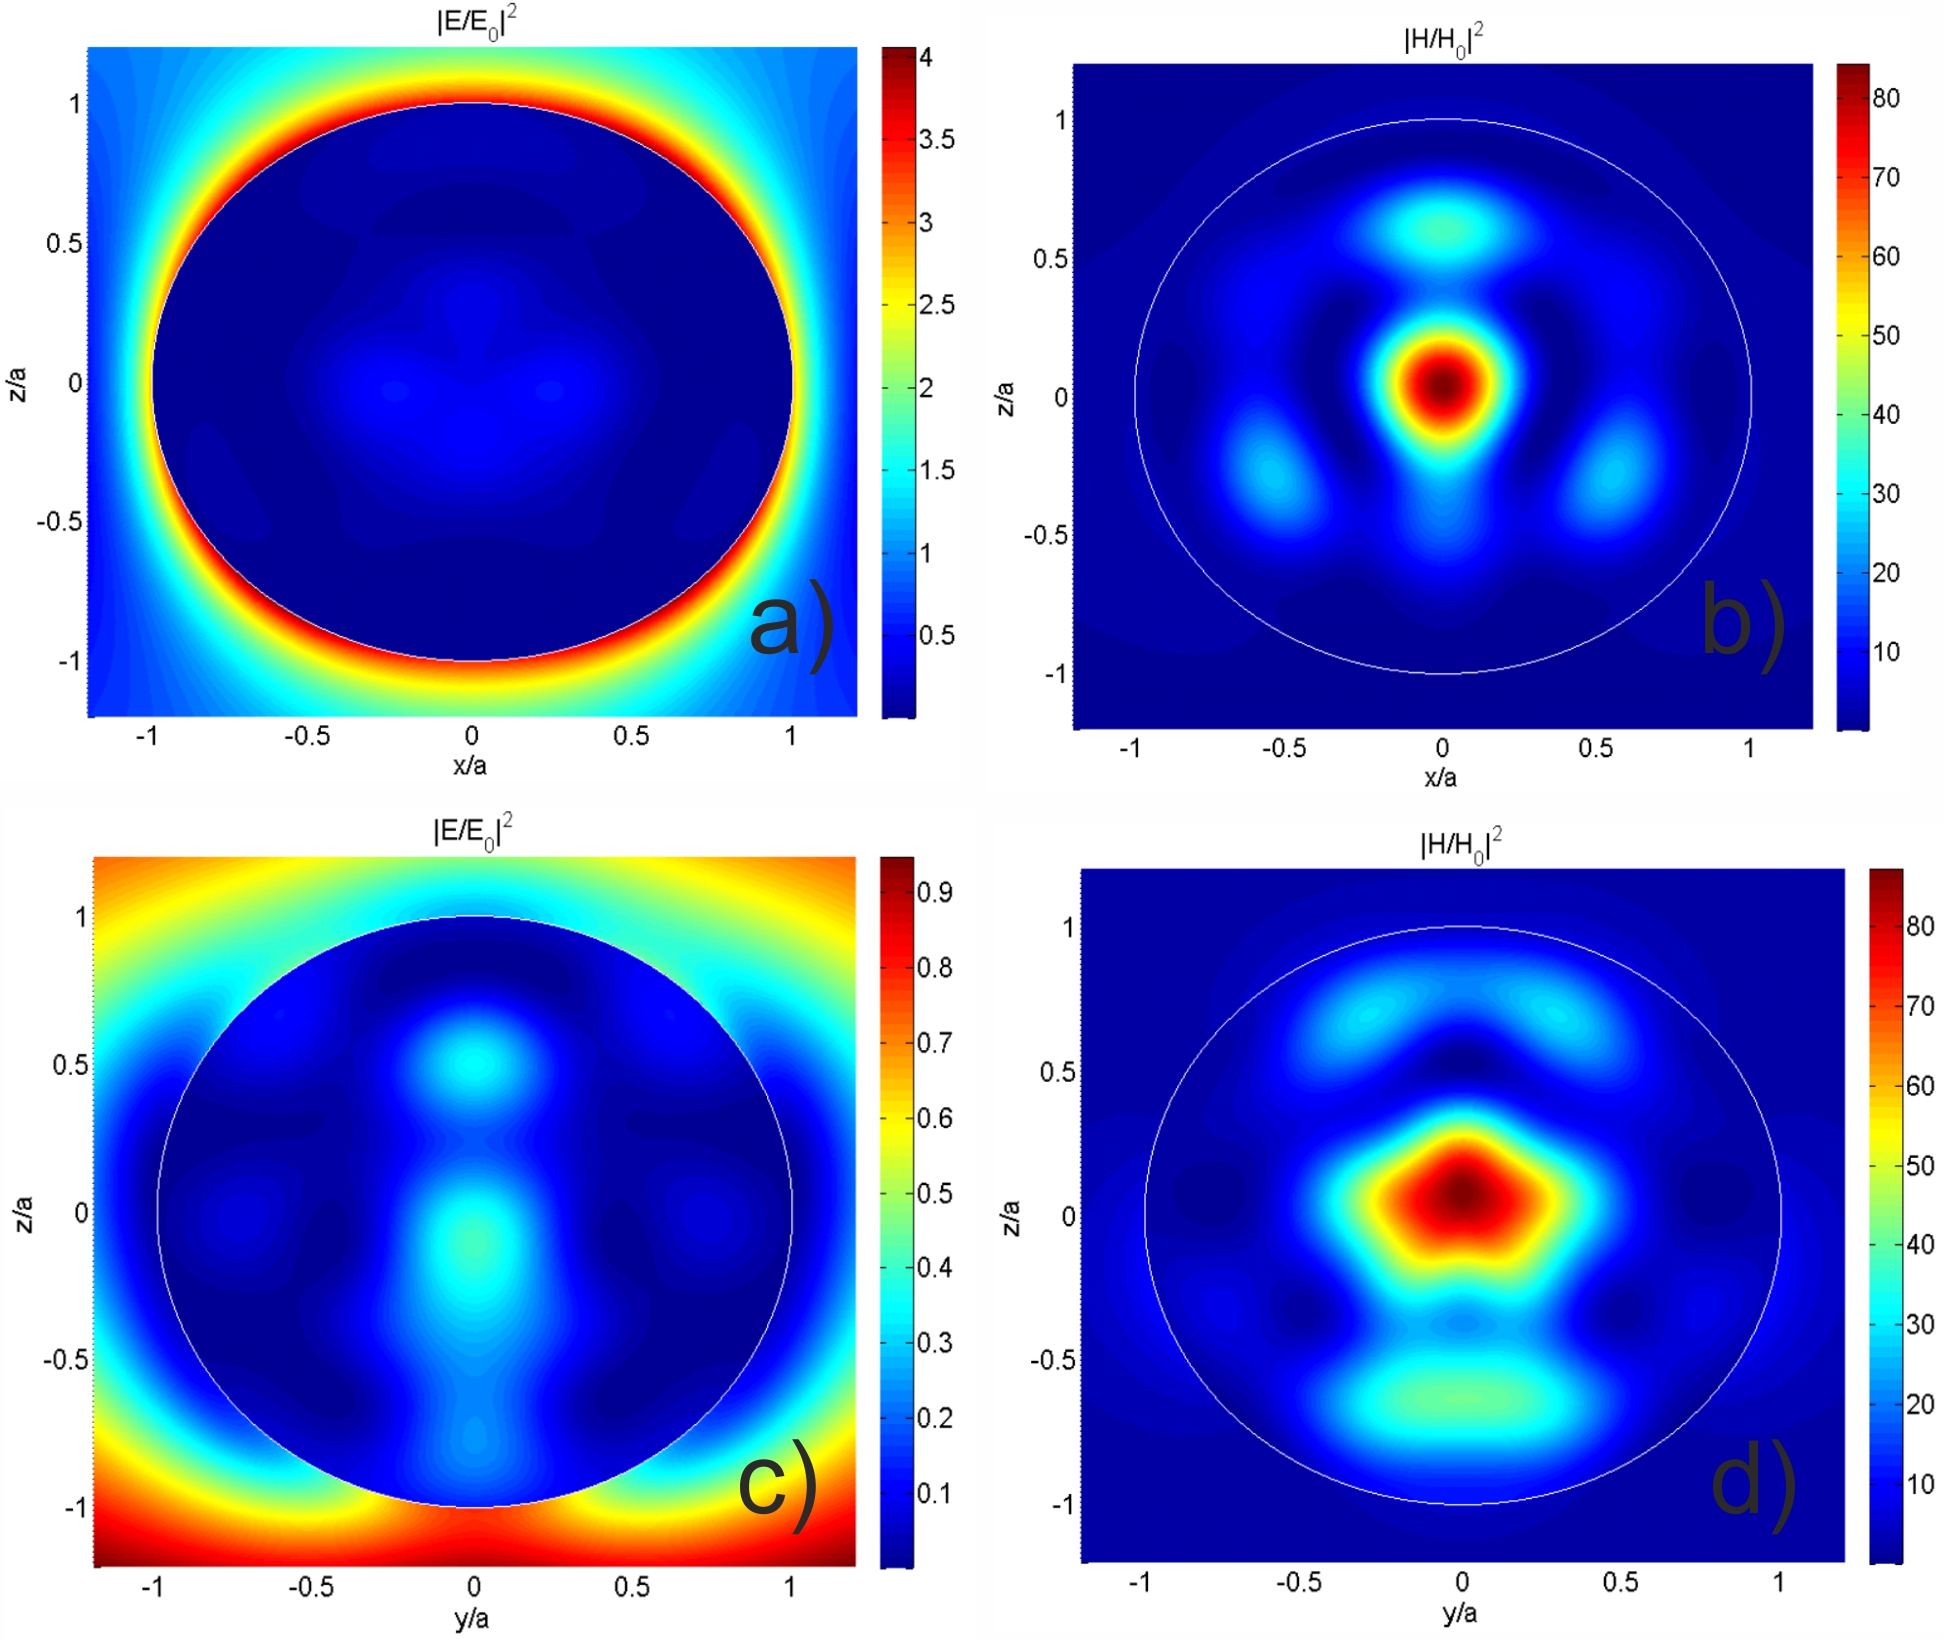


Figure S8. Description of the change in the Fano profile (see Fig.S1c) due to dissipation in the material of the sphere. The electric (a,c) and magnetic (b,d) field intensity enhancement distributions inside the particle within the *xz* (a,b) and *yz* (c,d) -planes for , (I) and (II).


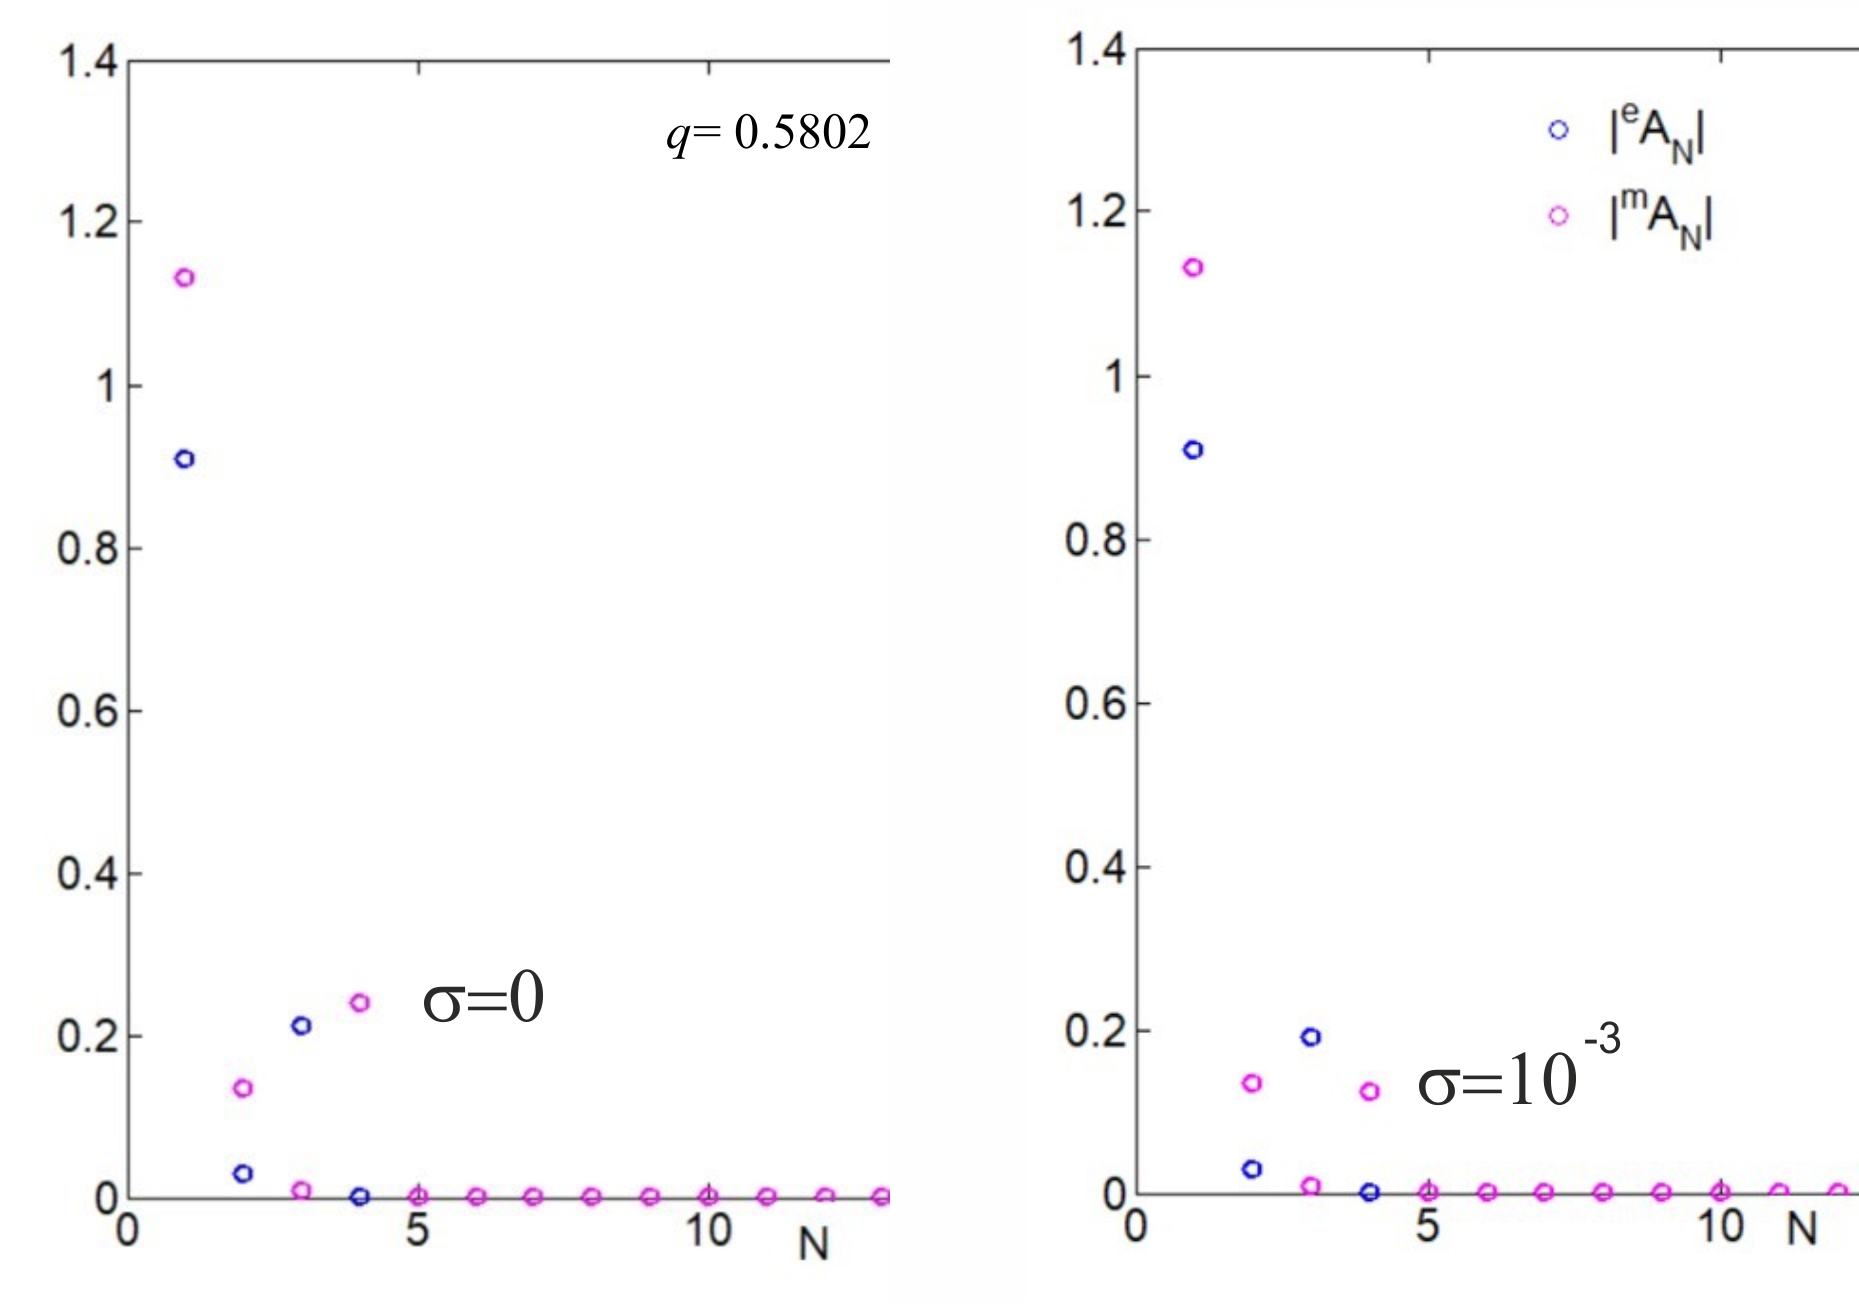


Figure S9. Distributions of the Mie coefficient’s amplitudes vs mode number for , (left) and (right).

References

1. Nenasheva, E.A., Kanareykin, A.D., Kartenko, N.F. *et al*. Ceramics Materials Based on (Ba, Sr)TiO3 Solid Solutions for Tunable Microwave Devices. *J Electroceram* 13, 235–238 (2004).
2. I. V. Minin, S.Zhou, O. V. Minin. The Superresonance Effect in a Low-Index Mesoscale Sphere. *Atmospheric and Oceanic Optics* 35, Suppl. 1, S1–S7 (2022).
3. M. I. Tribelsky, A. E. Miroshnichenko. Giant in-particle field concentration and Fano resonances at light scattering by high-refractive-index particles. *Phys. Rev. A* 93, 053837 (2016)
